# Supplementary material
Source: PubMed Central journal article supplement (PMC3277657)
Supplement: NIHMS336886-supplement-Supp_Figure_S1-S3_Table_S1-S9.pdf [file NIHMS336886-supplement-Supp_Figure_S1-S3_Table_S1-S9.pdf]

## Supplementary Materials for:

### Computational Protein Design with Explicit Consideration of Surface Hydrophobic Patches

Ron Jacak, Andrew Leaver-Fay, and Brian Kuhlman

#### Table of Contents

|                                                                                                                  |    |
|------------------------------------------------------------------------------------------------------------------|----|
| Table SI.....                                                                                                    | 1  |
| PDB codes of proteins used in design and weight optimization runs                                                |    |
| Table SII.....                                                                                                   | 2  |
| Average amount of hydrophobic accessible surface area exposed by each residue type at different levels of burial |    |
| Figure S1.....                                                                                                   | 3  |
| hpatch-fast score by hydrophobic patch area and number of neighbors                                              |    |
| Table SIII.....                                                                                                  | 4  |
| hpatch-fast score values by hydrophobic patch area and number of neighbors                                       |    |
| Figure S2.....                                                                                                   | 5  |
| hpatch-SASA score by hydrophobic patch area                                                                      |    |
| Table SIV.....                                                                                                   | 6  |
| hpatch-SASA score values by hydrophobic patch area                                                               |    |
| Table SV.....                                                                                                    | 7  |
| van der Waals radii used for SASA calculations                                                                   |    |
| Table SVI.....                                                                                                   | 8  |
| Unweighted, unfolded state energies by energy term for all amino acids                                           |    |
| Table SVII.....                                                                                                  | 9  |
| Final weights obtained from weight optimization runs for all energy functions tested                             |    |
| Table SVIII.....                                                                                                 | 10 |
| Surface Sequence Recovery                                                                                        |    |
| Figure S3.....                                                                                                   | 11 |
| Scatter plots of experimental versus predicted mutant free energy changes for all energy functions tested        |    |
| Table SIX.....                                                                                                   | 12 |
| Experimental and predicted mutant free energy changes for all energy functions tested                            |    |

| training set | size | fold  | test set | size | fold  |
|--------------|------|-------|----------|------|-------|
| 2igd         | 61   | a/b   | 1a8o     | 70   | all a |
| 1orc         | 64   | a/b   | 1hyp     | 75   | a     |
| 1hoe         | 74   | b     | 1bdo     | 80   | all b |
| 1aba         | 87   | a/b   | 1opd     | 85   | a/b   |
| 2acy         | 98   | a/b   | 1opc     | 99   | a/b   |
| 1bm8         | 99   | a/b   | 1by2     | 110  | a/b   |
| 1bxv         | 99   | b     | 2mcm     | 112  | b     |
| 1co6         | 107  | a/b   | 1bea     | 116  | a     |
| 1tmy         | 118  | a/b   | 2a0b     | 118  | all a |
| 1mai         | 119  | a/b   | 2mhr     | 118  | a     |
| 3pyp         | 125  | a/b   | 1b9o     | 123  | a     |
| 1c52         | 131  | a     | 1bqk     | 124  | a/b   |
| 1vsr         | 134  | a/b   | 1bfg     | 126  | all b |
| 1akr         | 147  | a/b   | 1ifc     | 131  | b     |
| 1bd8         | 156  | all a | 1bk9     | 134  | a     |
| 1bgc         | 165  | all a | 1pne     | 139  | a/b   |
| 1kao         | 167  | a/b   | 2sns     | 141  | a/b   |
| 1koe         | 172  | a/b   | 1amx     | 150  | b     |
| 1b2v         | 173  | a/b   | 1bj7     | 150  | a/b   |
| 2sga         | 181  | a/b   | 1a6m     | 151  | all a |
| 1gbs         | 185  | a/b   | 1ra9     | 159  | a/b   |
| 1qf9         | 194  | a/b   | 1qst     | 160  | a/b   |
| 1nkr         | 195  | all b | 1cju     | 166  | a/b   |
| 1cex         | 197  | a/b   | 1mh1     | 181  | a/b   |
| 1rgp         | 199  | all a | 3tss     | 190  | a/b   |
| 1ppn         | 212  | a/b   | 2pth     | 193  | a/b   |
| 1a7s         | 225  | a/b   | 2eng     | 210  | a/b   |
| 1azo         | 226  | a/b   | 1lbu     | 213  | a/b   |
| 1uch         | 226  | a/b   | 1g3p     | 217  | a/b   |
| 1bio         | 228  | b     | 3eug     | 225  | a/b   |
| 1amf         | 231  | a/b   | 1atg     | 231  | a/b   |
| 3seb         | 238  | a/b   | 1lst     | 240  | a/b   |

Table SI

PDB codes of proteins used in design and weight optimization runs.

| amino acid | average hydrophobic SASA ( $\text{\AA}^2$ ) |          |          |          |          |
|------------|---------------------------------------------|----------|----------|----------|----------|
|            | nbs1-10                                     | nbs11-13 | nbs14-16 | nbs17-20 | nbs21-24 |
| PHE        | 140.33                                      | 97.01    | 58.46    | 30.86    | 11.48    |
| TRP        | 139.78                                      | 95.72    | 58.85    | 34.59    | 16.70    |
| MET        | 129.12                                      | 97.25    | 61.79    | 33.03    | 11.05    |
| LEU        | 119.66                                      | 85.25    | 53.91    | 26.87    | 7.93     |
| TYR        | 114.72                                      | 83.56    | 55.49    | 30.61    | 13.05    |
| ILE        | 114.64                                      | 80.00    | 52.77    | 25.21    | 7.48     |
| LYS        | 101.83                                      | 81.16    | 63.23    | 42.99    | 23.74    |
| VAL        | 97.18                                       | 70.04    | 47.46    | 23.49    | 6.79     |
| PRO        | 93.59                                       | 72.40    | 52.45    | 31.07    | 12.69    |
| HIS        | 90.26                                       | 68.55    | 48.19    | 30.81    | 15.02    |
| CYS        | 80.59                                       | 53.46    | 32.72    | 16.52    | 5.64     |
| ARG        | 71.21                                       | 56.79    | 42.58    | 26.33    | 11.48    |
| THR        | 68.93                                       | 53.70    | 38.04    | 21.79    | 8.33     |
| ALA        | 63.72                                       | 50.20    | 35.41    | 17.71    | 5.48     |
| GLU        | 59.10                                       | 44.45    | 32.77    | 19.46    | 8.16     |
| GLN        | 51.72                                       | 39.30    | 29.56    | 17.62    | 7.27     |
| SER        | 47.41                                       | 37.45    | 27.29    | 14.82    | 5.37     |
| ASP        | 42.50                                       | 31.62    | 22.33    | 12.67    | 5.78     |
| GLY        | 38.24                                       | 31.12    | 23.67    | 13.42    | 5.24     |
| ASN        | 36.32                                       | 27.02    | 19.65    | 10.92    | 4.51     |

Table SII

Average amount of hydrophobic accessible surface area exposed by each residue type at 5 levels of burial: 10 or fewer neighbors, 11 to 13 neighbors, 14 to 16 neighbors, 17-20 neighbors, and 21-24 neighbors. The aromatic residues expose the most hydrophobic surface area, while asparagine and glycine expose the least.

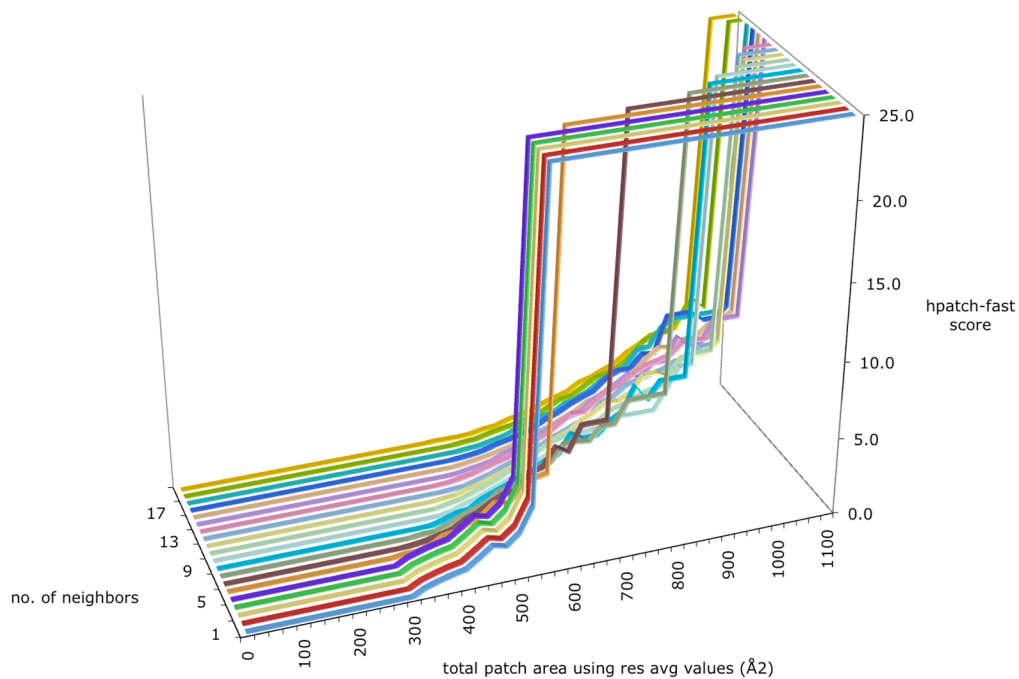

Figure S1

Plot of hpatch-fast score by hydrophobic patch area and number of neighbors. Each line represents the score for a given number of neighbors. Residues are only given hpatch-fast scores for having too much surrounding hydrophobic surface area. No score is given to residues with a patch area smaller than the most common patch area for that number of neighbors observed in native proteins. Patches of size 1100  $\text{\AA}^2$  and greater are given a score of 25.

| patch area | nb1   | nb2   | nb3   | nb4   | nb5   | nb6   | nb7   | nb8   | nb9   | nb10  | nb11  | nb12  | nb13  | nb14  | nb15  | nb16  | nb17  | nb18  | nb19  | nb20  |    |
|------------|-------|-------|-------|-------|-------|-------|-------|-------|-------|-------|-------|-------|-------|-------|-------|-------|-------|-------|-------|-------|----|
| 0          | 0     | 0     | 0     | 0     | 0     | 0     | 0     | 0     | 0     | 0     | 0     | 0     | 0     | 0     | 0     | 0     | 0     | 0     | 0     | 0     |    |
| 25         | 0     | 0     | 0     | 0     | 0     | 0     | 0     | 0     | 0     | 0     | 0     | 0     | 0     | 0     | 0     | 0     | 0     | 0     | 0     | 0     |    |
| 50         | 0     | 0     | 0     | 0     | 0     | 0     | 0     | 0     | 0     | 0     | 0     | 0     | 0     | 0     | 0     | 0     | 0     | 0     | 0     | 0     |    |
| 75         | 0     | 0     | 0     | 0     | 0     | 0     | 0     | 0     | 0     | 0     | 0     | 0     | 0     | 0     | 0     | 0     | 0     | 0     | 0     | 0     |    |
| 100        | 0     | 0     | 0     | 0     | 0     | 0     | 0     | 0     | 0     | 0     | 0     | 0     | 0     | 0     | 0     | 0     | 0     | 0     | 0     | 0     |    |
| 125        | 0     | 0     | 0     | 0     | 0     | 0     | 0     | 0     | 0     | 0     | 0     | 0     | 0     | 0     | 0     | 0     | 0     | 0     | 0     | 0     |    |
| 150        | 0     | 0     | 0     | 0     | 0     | 0     | 0     | 0     | 0     | 0     | 0     | 0     | 0     | 0     | 0     | 0     | 0     | 0     | 0     | 0     |    |
| 175        | 0     | 0     | 0     | 0     | 0     | 0     | 0     | 0     | 0     | 0     | 0     | 0     | 0     | 0     | 0     | 0     | 0     | 0     | 0     | 0     |    |
| 200        | 0     | 0     | 0     | 0     | 0     | 0     | 0     | 0     | 0     | 0     | 0     | 0     | 0     | 0     | 0     | 0     | 0     | 0     | 0     | 0     |    |
| 225        | 0     | 0     | 0     | 0     | 0     | 0     | 0     | 0     | 0     | 0     | 0     | 0     | 0     | 0     | 0     | 0     | 0     | 0     | 0     | 0     |    |
| 250        | 0     | 0     | 0     | 0     | 0     | 0     | 0     | 0     | 0     | 0     | 0     | 0     | 0     | 0     | 0     | 0     | 0     | 0     | 0     | 0     |    |
| 275        | 0     | 0     | 0     | 0     | 0     | 0     | 0     | 0     | 0     | 0     | 0     | 0     | 0     | 0     | 0     | 0     | 0     | 0     | 0     | 0     |    |
| 300        | 0     | 0     | 0     | 0     | 0     | 0     | 0     | 0     | 0     | 0     | 0     | 0     | 0     | 0     | 0     | 0     | 0     | 0     | 0     | 0     |    |
| 325        | 0.443 | 0.443 | 0.443 | 0.443 | 0.443 | 0.127 | 0     | 0     | 0     | 0     | 0     | 0     | 0     | 0     | 0     | 0     | 0     | 0     | 0     | 0     |    |
| 350        | 0.706 | 0.706 | 0.706 | 0.706 | 0.706 | 0.138 | 0.076 | 0     | 0     | 0     | 0     | 0     | 0     | 0     | 0     | 0     | 0     | 0     | 0     | 0     |    |
| 375        | 0.929 | 0.929 | 0.929 | 0.929 | 0.929 | 0.348 | 0.182 | 0.113 | 0     | 0     | 0     | 0     | 0     | 0     | 0     | 0     | 0     | 0     | 0     | 0     |    |
| 400        | 1.099 | 1.099 | 1.099 | 1.099 | 1.099 | 0.849 | 0.379 | 0.124 | 0.023 | 0     | 0     | 0     | 0     | 0     | 0     | 0     | 0     | 0     | 0     | 0     |    |
| 425        | 1.686 | 1.686 | 1.686 | 1.686 | 1.686 | 0.937 | 0.579 | 0.418 | 0.243 | 0.017 | 0     | 0     | 0     | 0     | 0     | 0     | 0     | 0     | 0     | 0     |    |
| 450        | 2.315 | 2.315 | 2.315 | 2.315 | 2.315 | 1.376 | 1.084 | 0.789 | 0.534 | 0.169 | 0.174 | 0.080 | 0.009 | 0     | 0     | 0     | 0     | 0     | 0     | 0     |    |
| 475        | 2.092 | 2.092 | 2.092 | 2.092 | 2.092 | 1.713 | 1.372 | 1.079 | 0.628 | 0.472 | 0.320 | 0.145 | 0.066 | 0.063 | 0     | 0     | 0     | 0     | 0     | 0     |    |
| 500        | 2.785 | 2.785 | 2.785 | 2.785 | 2.785 | 2.378 | 1.883 | 1.340 | 1.160 | 0.732 | 0.617 | 0.415 | 0.118 | 0.184 | 0.039 | 0     | 0     | 0.008 | 0     | 0.053 |    |
| 525        | 4.394 | 4.394 | 4.394 | 4.394 | 4.394 | 2.133 | 2.261 | 1.960 | 1.470 | 1.055 | 0.910 | 0.571 | 0.362 | 0.330 | 0.165 | 0.100 | 0.071 | 0.018 | 0.005 | 0.049 |    |
| 550        | 25    | 25    | 25    | 25    | 25    | 3.071 | 2.346 | 2.072 | 1.769 | 1.359 | 1.211 | 0.897 | 0.595 | 0.580 | 0.295 | 0.216 | 0.147 | 0.098 | 0.101 | 0.035 |    |
| 575        | 25    | 25    | 25    | 25    | 25    | 3.476 | 3.387 | 2.531 | 2.103 | 1.741 | 1.660 | 1.154 | 0.911 | 0.815 | 0.466 | 0.354 | 0.279 | 0.152 | 0.149 | 0.087 |    |
| 600        | 25    | 25    | 25    | 25    | 25    | 3.659 | 3.569 | 3.070 | 2.430 | 2.302 | 1.912 | 1.493 | 1.171 | 1.032 | 0.836 | 0.539 | 0.532 | 0.328 | 0.344 | 0.250 |    |
| 625        | 25    | 25    | 25    | 25    | 25    | 4.773 | 3.267 | 2.920 | 2.552 | 2.503 | 2.038 | 1.572 | 1.443 | 1.039 | 0.725 | 0.694 | 0.490 | 0.515 | 0.322 |       |    |
| 650        | 25    | 25    | 25    | 25    | 25    | 4.262 | 4.323 | 3.201 | 2.918 | 2.963 | 2.204 | 1.828 | 1.803 | 1.370 | 0.987 | 0.902 | 0.796 | 0.646 | 0.579 |       |    |
| 675        | 25    | 25    | 25    | 25    | 25    | 5.872 | 4.323 | 4.414 | 3.059 | 3.196 | 2.747 | 2.297 | 2.126 | 1.789 | 1.340 | 1.161 | 0.961 | 0.831 | 0.766 |       |    |
| 700        | 25    | 25    | 25    | 25    | 25    | 5.872 | 4.205 | 3.922 | 3.697 | 3.433 | 3.004 | 2.591 | 2.640 | 2.046 | 1.574 | 1.610 | 1.375 | 1.004 | 0.985 |       |    |
| 725        | 25    | 25    | 25    | 25    | 25    | 5.872 | 5.016 | 3.979 | 3.851 | 3.743 | 3.633 | 2.947 | 3.209 | 2.482 | 1.927 | 1.903 | 1.469 | 1.407 | 1.284 |       |    |
| 750        | 25    | 25    | 25    | 25    | 25    | 5.016 | 4.733 | 3.894 | 3.907 | 3.989 | 3.242 | 3.163 | 2.670 | 2.271 | 2.343 | 1.949 | 1.825 | 1.550 |       |       |    |
| 775        | 25    | 25    | 25    | 25    | 25    | 6.402 | 5.203 | 4.464 | 4.467 | 4.549 | 4.057 | 3.812 | 3.309 | 2.766 | 2.687 | 2.175 | 1.953 | 1.780 |       |       |    |
| 800        | 25    | 25    | 25    | 25    | 25    | 6.402 | 6.812 | 4.390 | 4.675 | 4.488 | 4.357 | 4.323 | 3.670 | 3.039 | 2.978 | 2.532 | 2.426 | 2.287 |       |       |    |
| 825        | 25    | 25    | 25    | 25    | 25    | 6.402 | 5.714 | 4.390 | 5.042 | 4.924 | 4.955 | 4.534 | 4.156 | 3.504 | 3.686 | 3.092 | 2.914 | 2.498 |       |       |    |
| 850        | 25    | 25    | 25    | 25    | 25    | 6.402 | 6.812 | 4.390 | 5.294 | 5.935 | 5.156 | 5.170 | 4.695 | 3.921 | 4.106 | 3.425 | 3.068 | 2.849 |       |       |    |
| 875        | 25    | 25    | 25    | 25    | 25    | 6.812 | 5.643 | 5.448 | 5.935 | 5.407 | 5.576 | 4.338 | 4.343 | 4.063 | 3.720 | 3.401 | 3.171 |       |       |       |    |
| 900        | 25    | 25    | 25    | 25    | 25    | 6.812 | 7.029 | 6.546 | 5.530 | 5.561 | 5.758 | 5.137 | 5.091 | 4.938 | 4.788 | 4.027 | 3.787 |       |       |       |    |
| 925        | 25    | 25    | 25    | 25    | 25    | 25    | 25    | 7.029 | 7.239 | 6.628 | 5.967 | 5.981 | 5.137 | 5.678 | 4.843 | 4.883 | 4.860 | 4.193 |       |       |    |
| 950        | 25    | 25    | 25    | 25    | 25    | 25    | 25    | 25    | 7.239 | 6.628 | 5.967 | 6.674 | 6.641 | 5.496 | 7.241 | 6.087 | 5.217 | 4.685 |       |       |    |
| 975        | 25    | 25    | 25    | 25    | 25    | 25    | 25    | 25    | 7.239 | 6.628 | 6.660 | 6.674 | 5.948 | 5.902 | 7.241 | 6.493 | 5.217 | 4.781 |       |       |    |
| 1000       | 25    | 25    | 25    | 25    | 25    | 25    | 25    | 25    | 25    | 7.322 | 6.660 | 6.674 | 5.948 | 5.902 | 7.241 | 6.493 | 6.064 | 4.886 |       |       |    |
| 1025       | 25    | 25    | 25    | 25    | 25    | 25    | 25    | 25    | 25    | 25    | 25    | 25    | 7.368 | 7.334 | 6.595 | 6.548 | 6.493 | 7.163 | 6.390 |       |    |
| 1050       | 25    | 25    | 25    | 25    | 25    | 25    | 25    | 25    | 25    | 25    | 25    | 25    | 25    | 7.334 | 6.595 | 6.548 | 6.493 | 6.470 | 25    |       |    |
| 1075       | 25    | 25    | 25    | 25    | 25    | 25    | 25    | 25    | 25    | 25    | 25    | 25    | 25    | 7.334 | 7.288 | 7.241 | 6.493 | 25    | 25    |       |    |
| 1100       | 25    | 25    | 25    | 25    | 25    | 25    | 25    | 25    | 25    | 25    | 25    | 25    | 25    | 25    | 25    | 25    | 25    | 25    | 25    | 25    | 25 |

Table SIII

hpatch-fast score by hydrophobic patch area and number of neighbors.

The number of occurrences of each patch area and neighbor count for every residue with 20 or fewer neighbors in a set of monomeric proteins was determined using Rosetta. The inverse log of the probabilities was taken to obtain scores. The score for patch areas smaller than the most common patch area was set to the minimum score at that number of neighbors. The entire score was then shifted down so that the minimum hpatch-fast score at each number of neighbors is 0. Patches of size 1100 Å<sup>2</sup> and greater are given a score of 25.

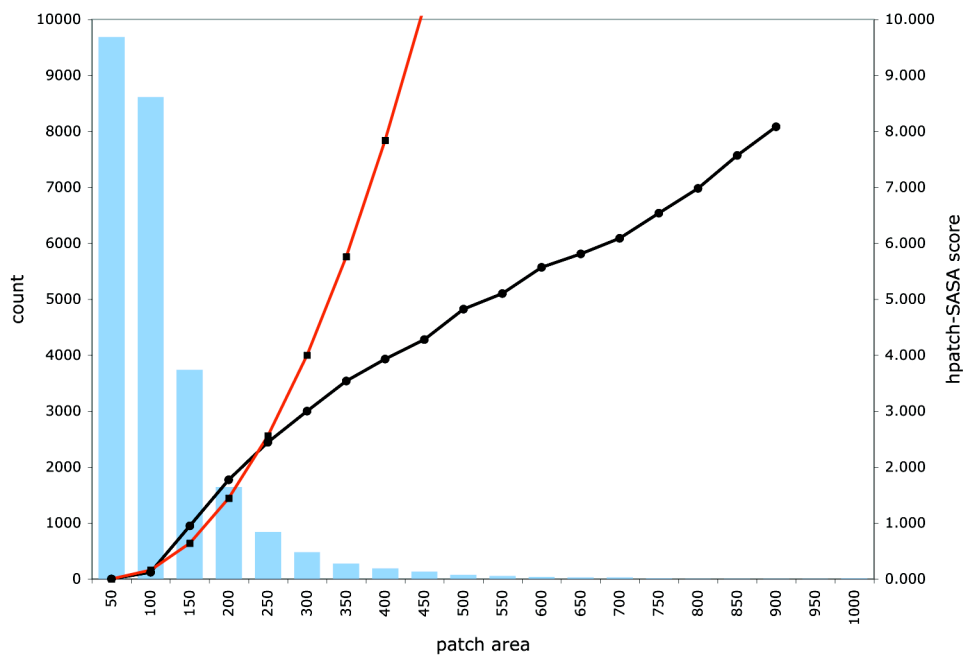

Figure S2

Plot of hpatch-SASA score by hydrophobic patch area. Blue bars represent the counts of the indicated patch size found in the set of monomeric structures. The red line is the hpatch-SASA score. The black line shows the score if the inverse log of the probabilities is used. Patches of size greater than 900 Å<sup>2</sup> are given a score of 100.

| patch area | count | hpatch-SASA score |
|------------|-------|-------------------|
| 0          | 9692  | 0.00              |
| 50         | 8613  | 0.16              |
| 100        | 3740  | 0.64              |
| 150        | 1645  | 1.44              |
| 200        | 844   | 2.56              |
| 250        | 484   | 4.00              |
| 300        | 281   | 5.76              |
| 350        | 190   | 7.84              |
| 400        | 134   | 10.24             |
| 450        | 78    | 12.96             |
| 500        | 59    | 16.00             |
| 550        | 37    | 19.36             |
| 600        | 29    | 23.04             |
| 650        | 22    | 27.04             |
| 700        | 14    | 31.36             |
| 750        | 9     | 36.00             |
| 800        | 5     | 40.96             |
| 850        | 3     | 46.24             |
| 900        |       | 100.00            |
| 950        |       | 100.00            |

Table SIV

hpatch-SASA score by hydrophobic patch area.

The number of occurrences of each patch area in the set of monomeric proteins was determined using Rosetta. An exponential curve that more strongly penalizes large patches was used instead of the inverse log of the probabilities to obtain the score. The entire score was shifted down so that the minimum hpatch-SASA score is 0. Patches of size 900 Å<sup>2</sup> or greater are given a score of 100.

| atom type | vdW radius |
|-----------|------------|
| CNH2      | 1.76       |
| COO       | 1.76       |
| CH1       | 1.87       |
| CH2       | 1.87       |
| CH3       | 1.87       |
| aroC      | 1.76       |
| Ntrp      | 1.65       |
| Nhis      | 1.65       |
| NH2O      | 1.65       |
| Nlys      | 1.5        |
| Narg      | 1.65       |
| Npro      | 1.65       |
| OH        | 1.4        |
| ONH2      | 1.4        |
| OOC       | 1.4        |
| Oaro      | 1.4        |
| S         | 1.85       |
| Nbb       | 1.65       |
| CAbb      | 1.87       |
| CObb      | 1.76       |
| OCbb      | 1.4        |

Table SV

van der Waals radii used for SASA calculations



| AA  | fa_atr | fa_rep | fa_sol | fa_intra_rep | pro_close | fa_pair | hbond_sr_bb | hbond_lr_bb | hbond_bb_sc | hbond_sc | rama  | omega | fa_dun | p_aa_pp |
|-----|--------|--------|--------|--------------|-----------|---------|-------------|-------------|-------------|----------|-------|-------|--------|---------|
| ALA | 2.56   | -0.57  | -1.57  | -0.23        | -0.00     | 0       | 0.53        | 0.027       | 0.006       | 0        | 0.21  | -0.15 | 0      | 0.16    |
| ARG | 3.18   | -0.62  | -2.22  | -2.10        | -0.01     | 0.09    | 0.49        | 0.017       | 0.021       | 0.013    | 0.26  | -0.17 | -2.33  | 0.10    |
| ASN | 2.87   | -0.63  | -2.41  | -1.66        | -0.01     | 0.08    | 0.39        | 0.017       | 0.031       | 0.006    | -0.03 | -0.18 | -1.17  | 0.25    |
| ASP | 3.00   | -0.68  | -2.46  | -1.50        | -0.01     | 0.10    | 0.40        | 0.017       | 0.042       | 0.013    | 0.01  | -0.16 | -0.87  | 0.19    |
| CYS | 2.54   | -0.62  | -1.70  | -0.40        | -0.01     | 0       | 0.39        | 0.032       | 0.007       | 0        | -0.02 | -0.24 | -0.55  | -0.13   |
| GLN | 3.15   | -0.67  | -2.24  | -1.55        | -0.01     | 0.05    | 0.50        | 0.011       | 0.018       | 0.004    | 0.23  | -0.17 | -1.72  | 0.07    |
| GLU | 3.07   | -0.63  | -2.17  | -1.56        | -0.00     | 0.14    | 0.48        | 0.012       | 0.015       | 0.009    | 0.41  | -0.14 | -1.72  | 0.14    |
| GLY | 1.69   | -0.49  | -1.20  | -0.02        | -0.00     | 0       | 0.31        | 0.014       | 0.009       | 0        | -0.66 | -0.15 | 0      | 1.06    |
| HIS | 3.53   | -0.70  | -2.35  | -0.99        | -0.00     | 0.02    | 0.41        | 0.017       | 0.023       | 0.006    | 0.03  | -0.21 | -1.36  | 0.08    |
| ILE | 2.93   | -0.61  | -1.58  | -4.74        | -0.01     | 0       | 0.44        | 0.022       | 0.004       | 0        | 0.20  | -0.17 | -0.49  | 0.36    |
| LEU | 3.24   | -0.65  | -1.77  | -2.05        | -0.00     | 0       | 0.54        | 0.034       | 0.005       | 0        | 0.13  | -0.17 | -0.61  | 0.17    |
| LYS | 2.81   | -0.66  | -1.81  | -1.08        | -0.00     | 0.12    | 0.45        | 0.015       | 0.009       | 0.001    | 0.29  | -0.16 | -1.53  | 0.02    |
| MET | 3.27   | -0.68  | -1.87  | -1.12        | -0.01     | 0       | 0.53        | 0.027       | 0.005       | 0        | 0.10  | -0.17 | -1.92  | 0.07    |
| PHE | 3.68   | -0.73  | -1.73  | -6.68        | -0.01     | 0       | 0.43        | 0.022       | 0.006       | 0        | 0.12  | -0.22 | -1.03  | 0.10    |
| PRO | 2.23   | -1.04  | -1.14  | -0.36        | -0.39     | 0       | 0.18        | 0.002       | 0.002       | 0        | 0.15  | -0.18 | -0.63  | 1.13    |
| SER | 2.45   | -0.62  | -1.93  | -0.37        | -0.01     | 0.09    | 0.37        | 0.018       | 0.036       | 0.010    | -0.02 | -0.19 | -0.62  | 0.08    |
| THR | 2.62   | -0.61  | -2.00  | -1.82        | -0.01     | 0.04    | 0.37        | 0.011       | 0.033       | 0.009    | 0.02  | -0.18 | -0.27  | 0.14    |
| TRP | 4.51   | -0.87  | -2.23  | -6.39        | -0.01     | 0       | 0.43        | 0.018       | 0.009       | 0.001    | 0.09  | -0.21 | -1.95  | 0.04    |
| TYR | 3.75   | -0.74  | -1.92  | -6.55        | -0.00     | 0       | 0.41        | 0.020       | 0.008       | 0.003    | 0.11  | -0.23 | -0.97  | 0.10    |
| VAL | 2.63   | -0.58  | -1.46  | -3.26        | -0.01     | 0       | 0.37        | 0.019       | 0.004       | 0        | 0.22  | -0.18 | -0.24  | 0.34    |

Table SVI

Unweighted unfolded state energies by energy term for all amino acids. The dot product of the unweighted energies for an amino acid with a set of weights gives the unfolded state energy of that amino acid.

|               | energy function |                            |                                          |                                |                                              |                               |                                            |
|---------------|-----------------|----------------------------|------------------------------------------|--------------------------------|----------------------------------------------|-------------------------------|--------------------------------------------|
|               | current Rosetta | standard, reweighted refEs | standard + hpatch-SASA, reweighted refEs | standard, all terms reweighted | standard + hpatch-SASA, all terms reweighted | unfoldedE, reweight all terms | unfolded + hpatch-SASA, reweight all terms |
| run_id        | 616             | 681/682                    | 683/684b                                 | 653/654                        | 663/664c                                     | 685/686                       | 687/688                                    |
| fa_atr        | 0.8             | 0.8                        | 0.8                                      | 0.8                            | 0.8                                          | 0.8                           | 0.8                                        |
| fa_rep        | 0.44            | 0.44                       | 0.44                                     | 0.561                          | 0.438                                        | 0.594                         | 0.498                                      |
| fa_sol        | 0.65            | 0.65                       | 0.65                                     | 0.998                          | 0.939                                        | 1.333                         | 1.435                                      |
| fa_intra_rep  | 0.004           | 0.004                      | 0.004                                    | 0.182                          | 0.220                                        | 0.056                         | 0.558                                      |
| pro_close     | 1               | 1                          | 1                                        | 0.010                          | 0.008                                        | 0.001                         | 0.095                                      |
| fa_pair       | 0.49            | 0.49                       | 0.49                                     | 0.666                          | 0.642                                        | 0.457                         | 0.428                                      |
| hbond_sr_bb   | 0.585           | 0.585                      | 0.585                                    | 0.585                          | 0.585                                        | 0.585                         | 0.585                                      |
| hbond_lr_bb   | 1.17            | 1.17                       | 1.17                                     | 1.17                           | 1.17                                         | 1.17                          | 1.17                                       |
| hbond_bb_sc   | 1.17            | 1.17                       | 1.17                                     | 3.398                          | 3.503                                        | 3.220                         | 3.647                                      |
| hbond_sc      | 1.1             | 1.1                        | 1.1                                      | 1.348                          | 1.236                                        | 1.303                         | 1.834                                      |
| dslf_ss_dst   | 1               | 1                          | 1                                        | 1                              | 1                                            | 1                             | 1                                          |
| dslf_cs_ang   | 1               | 1                          | 1                                        | 1                              | 1                                            | 1                             | 1                                          |
| dslf_ss_dih   | 1               | 1                          | 1                                        | 1                              | 1                                            | 1                             | 1                                          |
| dslf_ca_dih   | 1               | 1                          | 1                                        | 1                              | 1                                            | 1                             | 1                                          |
| rama          | 0.2             | 0.2                        | 0.2                                      | 0.005                          | 0.002                                        | 0.045                         | 0.038                                      |
| omega         | 0.5             | 0.5                        | 0.5                                      | 0.5                            | 0.5                                          | 0.5                           | 0.5                                        |
| fa_dun        | 0.56            | 0.56                       | 0.56                                     | 0.508                          | 0.333                                        | 0.283                         | 0.280                                      |
| p_aa_pp       | 0.32            | 0.32                       | 0.32                                     | 0.981                          | 1.047                                        | 0.950                         | 1.026                                      |
| ref/unfolded  | 1               | 1                          | 1                                        | 1                              | 1                                            | 1                             | 1                                          |
| hpatch        |                 |                            | 0.2                                      |                                | 0.3                                          |                               | 0.5                                        |
| ALA           | 0.16            | 0.12                       | 0.20                                     | 0.83                           | 0.60                                         | 0.52                          | 1.53                                       |
| CYS           | 1.7             | -0.04                      | 0.07                                     | 0.44                           | 0.36                                         | -0.27                         | 0.63                                       |
| ASP           | -0.67           | -0.48                      | -0.42                                    | -0.66                          | -0.45                                        | -0.58                         | -0.26                                      |
| GLU           | -0.81           | -0.61                      | -0.55                                    | -0.65                          | -0.27                                        | -0.42                         | -0.12                                      |
| PHE           | 0.63            | 1.17                       | 1.01                                     | 0.26                           | -0.18                                        | 0.29                          | -1.94                                      |
| GLY           | -0.17           | -0.40                      | -0.27                                    | 0.42                           | 0.18                                         | 1.07                          | 2.29                                       |
| HIS           | 0.56            | 0.98                       | 0.97                                     | 1.02                           | 1.11                                         | -0.36                         | 0.21                                       |
| ILE           | 0.24            | 0.38                       | 0.31                                     | -0.03                          | -0.20                                        | 0.50                          | -0.73                                      |
| LYS           | -0.65           | -0.42                      | -0.41                                    | -0.28                          | -0.10                                        | -0.27                         | 0.29                                       |
| LEU           | -0.1            | 0.20                       | 0.09                                     | 0.27                           | -0.03                                        | 0.48                          | 0.57                                       |
| MET           | -0.34           | -0.20                      | -0.25                                    | 0.02                           | 0.13                                         | -0.07                         | 0.48                                       |
| ASN           | -0.89           | -0.76                      | -0.72                                    | -0.87                          | -0.59                                        | -0.71                         | -0.47                                      |
| PRO           | 0.02            | -0.81                      | -0.89                                    | 0.57                           | 0.88                                         | 1.02                          | 2.10                                       |
| GLN           | -0.97           | -0.82                      | -0.62                                    | -0.80                          | -0.45                                        | -0.59                         | -0.29                                      |
| ARG           | -0.98           | -0.79                      | -0.74                                    | -0.87                          | -0.47                                        | -0.64                         | -0.62                                      |
| SER           | -0.37           | -0.23                      | -0.26                                    | 0.27                           | 0.14                                         | -0.32                         | 0.60                                       |
| THR           | -0.27           | -0.18                      | -0.20                                    | -0.19                          | -0.34                                        | -0.22                         | -0.04                                      |
| VAL           | 0.29            | 0.22                       | 0.25                                     | 0.15                           | -0.03                                        | 0.53                          | 0.05                                       |
| TRP           | 0.91            | 1.73                       | 1.50                                     | 0.29                           | 0.12                                         | -0.08                         | -2.20                                      |
| TYR           | 0.51            | 0.95                       | 0.91                                     | -0.18                          | -0.42                                        | 0.11                          | -2.07                                      |
| ddG           | 0.69            | 0.68                       | 0.681                                    | 0.609                          | 0.635                                        |                               |                                            |
| core          | 49.2            | 51.7                       | 52.5                                     | 51.6                           | 52.3                                         | 47.7                          | 48.4                                       |
| overall       | 32.9            | 35.1                       | 35.5                                     | 35.2                           | 36.5                                         | 30.5                          | 29.8                                       |
| surface       | 24.9            | 27.9                       | 27.3                                     | 27.3                           | 28.9                                         | 21.0                          | 19.9                                       |
| %hp/surface   | 29.5            | 31.8                       | 27.1                                     | 28.9                           | 27.7                                         | 46.4                          | 30.3                                       |
| largest patch | 813             | 694                        | 446                                      | 735                            | 433                                          | 1479                          | 464                                        |

Table SVII

Final weights obtained from weight optimization runs for various energy functions including the hpatch score and/or the unfolded state energy term.

no. designed (surface positions)

| Residue | natives | current<br>Rosetta<br>weights | current<br>Rosetta,<br>fit refEs<br>only | current<br>Rosetta +<br>hpatch-<br>SASA,<br>fit refEs<br>only | standard<br>Rosetta,<br>reweight<br>all terms | standard +<br>hpatch-<br>SASA | standard,<br>no refE +<br>unfoldedE | standard, no<br>refE +<br>unfoldedE,<br>hpatch-<br>SASA |
|---------|---------|-------------------------------|------------------------------------------|---------------------------------------------------------------|-----------------------------------------------|-------------------------------|-------------------------------------|---------------------------------------------------------|
| ALA     | 144     | 30                            | 100                                      | 59                                                            | 47                                            | 56                            | 44                                  | 42                                                      |
| CYS     | 2       | 0                             | 12                                       | 8                                                             | 6                                             | 6                             | 24                                  | 16                                                      |
| ASP     | 167     | 221                           | 158                                      | 176                                                           | 182                                           | 164                           | 33                                  | 77                                                      |
| GLU     | 180     | 158                           | 144                                      | 178                                                           | 196                                           | 178                           | 53                                  | 88                                                      |
| PHE     | 23      | 68                            | 21                                       | 19                                                            | 14                                            | 20                            | 85                                  | 51                                                      |
| GLY     | 210     | 205                           | 252                                      | 228                                                           | 223                                           | 225                           | 190                                 | 189                                                     |
| HIS     | 37      | 32                            | 11                                       | 16                                                            | 22                                            | 32                            | 275                                 | 308                                                     |
| ILE     | 33      | 39                            | 48                                       | 38                                                            | 47                                            | 39                            | 53                                  | 52                                                      |
| LYS     | 193     | 148                           | 97                                       | 120                                                           | 110                                           | 104                           | 64                                  | 40                                                      |
| LEU     | 54      | 174                           | 85                                       | 81                                                            | 82                                            | 96                            | 46                                  | 29                                                      |
| MET     | 20      | 5                             | 15                                       | 7                                                             | 12                                            | 5                             | 83                                  | 32                                                      |
| ASN     | 110     | 120                           | 144                                      | 182                                                           | 163                                           | 131                           | 77                                  | 85                                                      |
| PRO     | 144     | 40                            | 143                                      | 140                                                           | 178                                           | 141                           | 127                                 | 69                                                      |
| GLN     | 94      | 110                           | 142                                      | 44                                                            | 134                                           | 124                           | 69                                  | 174                                                     |
| ARG     | 85      | 76                            | 81                                       | 97                                                            | 90                                            | 79                            | 71                                  | 153                                                     |
| SER     | 119     | 128                           | 90                                       | 131                                                           | 62                                            | 127                           | 110                                 | 112                                                     |
| THR     | 145     | 110                           | 146                                      | 181                                                           | 137                                           | 178                           | 52                                  | 67                                                      |
| VAL     | 60      | 37                            | 104                                      | 75                                                            | 75                                            | 64                            | 33                                  | 30                                                      |
| TRP     | 12      | 56                            | 3                                        | 9                                                             | 12                                            | 22                            | 314                                 | 168                                                     |
| TYR     | 23      | 98                            | 59                                       | 66                                                            | 63                                            | 64                            | 52                                  | 73                                                      |

Table VIII

Amino acid composition of surface residues for redesigns created with optimized energy functions.

The table shows the number of occurrences of each residue type in the set of native testing proteins and in redesigns created with the indicated energy functions. The counts shown are over surface positions only, here defined as positions with 15 or fewer neighbors.

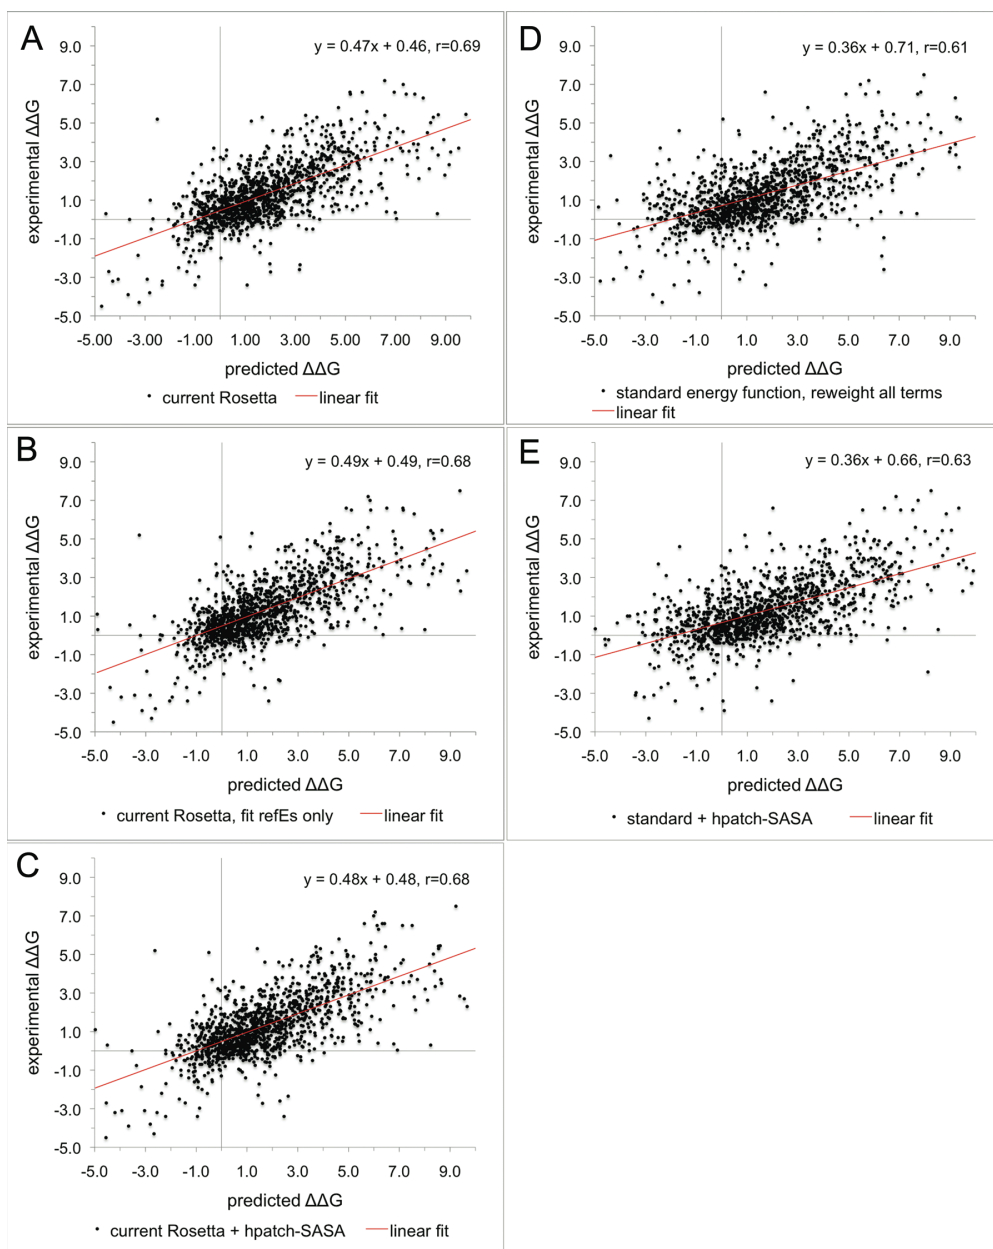

Figure S3

Performance of all energy functions tested in predicting mutant changes in free energy. Predicted values are plotted on the x-axis versus experimental values plotted on the y-axis (kcal/mol). The red-line indicates the best fit line. The equation of the best-fit line ( $y$ ) and the correlation coefficient ( $r$ ) are provided in the upper right hand corner. The energy functions tested are as follows: A) the current Rosetta energy function, B) current Rosetta with reweighted reference energies, C) current Rosetta with the hpatch-SASA score and reweighted reference energies, D) standard Rosetta with all terms reweighted, and E) standard Rosetta with the hpatch-SASA score with all terms reweighted.

Supplementary Table IX. Experimental and predicted changes in free energy for all mutants in the dataset for all energy functions tested.

Mutations are specified as PDB\_wild type amino acid\_position\_mutant amino acid

Example:

107L\_G\_44\_S is the point mutant glycine to serine at position 44 in the PDB file 107L.

Predicted  $\Delta\Delta G$ 's are reported for each of the following energy functions:

|                                              |                                                                                                                                                                |
|----------------------------------------------|----------------------------------------------------------------------------------------------------------------------------------------------------------------|
| current Rosetta                              | the current Rosetta energy function previously optimized for native sequence recovery only                                                                     |
| current Rosetta, fit refEs only              | the current Rosetta energy function with the reference energies optimized for native sequence recovery and amino acid composition                              |
| current Rosetta + hpatch-SASA                | the current Rosetta energy function using the hpatch-SASA score, with the reference energies optimized for native sequence recovery and amino acid composition |
| standard energy function, reweight all terms | A reweighted Rosetta energy function optimized for native sequence recovery and amino acid composition                                                         |
| standard + hpatch-SASA energy function       | A reweighted Rosetta energy function using the hpatch-SASA score, optimized for native sequence recovery and amino acid composition                            |

| mutation     | predicted ddG    |                 |                                 |                               |                                              |                        |
|--------------|------------------|-----------------|---------------------------------|-------------------------------|----------------------------------------------|------------------------|
|              | experimental ddG | current Rosetta | current Rosetta, fit refEs only | current Rosetta + hpatch-SASA | standard energy function, reweight all terms | standard + hpatch-SASA |
| 107L_G_44_S  | -0.53            | -0.61           | -0.28                           | -0.34                         | 1.15                                         | 1.13                   |
| 160I_A_120_M | -0.20            | -0.83           | -0.60                           | -0.77                         | 0.07                                         | -4.61                  |
| 161I_A_116_N | 0.17             | 0.00            | 0.24                            | 0.20                          | 0.20                                         | -0.27                  |
| 162I_A_122_Q | -0.24            | 0.03            | 0.28                            | 0.88                          | -1.58                                        | 6.51                   |
| 163I_A_123_Q | -0.22            | -1.43           | -1.33                           | -1.90                         | -1.27                                        | -0.22                  |
| 164I_A_119_R | -0.18            | 0.64            | 0.76                            | 0.45                          | 2.82                                         | 2.95                   |
| 165I_A_117_S | 1.27             | 1.39            | 1.54                            | 1.59                          | 2.37                                         | 1.25                   |
| 171I_A_45_E  | 0.01             | 1.57            | 1.08                            | -0.11                         | 0.89                                         | 1.13                   |
| 1a2p_A_30_C  | 0.90             | 2.31            | 0.83                            | 0.57                          | 1.79                                         | 1.62                   |
| 1a2p_A_30_D  | 0.61             | 0.45            | 0.70                            | 0.58                          | 1.30                                         | 1.45                   |
| 1a2p_A_30_F  | 0.59             | -0.70           | -0.18                           | -0.40                         | 0.75                                         | -0.07                  |
| 1a2p_A_30_G  | 0.81             | 1.36            | 1.04                            | 1.23                          | 1.86                                         | 1.77                   |
| 1a2p_A_30_H  | 0.70             | 0.32            | 0.69                            | 0.54                          | 1.05                                         | 1.42                   |
| 1a2p_A_30_I  | 0.72             | -0.28           | 0.07                            | -0.29                         | 0.35                                         | 0.37                   |
| 1a2p_A_30_K  | 0.10             | -0.30           | 0.02                            | -0.12                         | 0.87                                         | 0.71                   |
| 1a2p_A_30_L  | 0.26             | -0.76           | -0.35                           | -0.43                         | -0.32                                        | -0.48                  |
| 1a2p_A_30_M  | 0.21             | -0.13           | -0.11                           | -0.08                         | 0.04                                         | 0.21                   |
| 1a2p_A_30_N  | 0.57             | -0.26           | -0.05                           | -0.10                         | 1.02                                         | 1.10                   |
| 1a2p_A_30_P  | 3.99             | 7.04            | 6.20                            | 5.89                          | 6.56                                         | 5.99                   |
| 1a2p_A_30_Q  | 0.38             | -0.50           | -0.28                           | -0.07                         | 0.22                                         | 0.72                   |
| 1a2p_A_30_R  | 0.05             | -0.15           | 0.19                            | 0.16                          | 0.31                                         | 0.52                   |
| 1a2p_A_30_S  | 0.31             | 0.42            | 0.73                            | 0.46                          | 1.77                                         | 0.84                   |
| 1a2p_A_30_T  | 0.69             | 0.69            | 0.69                            | 0.76                          | 0.95                                         | 1.51                   |

|              |       |       |       |       |       |       |
|--------------|-------|-------|-------|-------|-------|-------|
| 1a2p_A_30_V  | 0.79  | 0.36  | 0.35  | 0.25  | 0.66  | 0.58  |
| 1a2p_A_30_W  | 0.88  | -1.09 | -0.22 | -0.79 | -0.30 | -0.70 |
| 1a2p_A_30_Y  | 0.70  | -0.84 | -0.26 | -0.32 | 0.47  | 0.15  |
| 1a2p_D_10_A  | 0.39  | 0.11  | 0.00  | -0.20 | -2.19 | -2.15 |
| 1a2p_D_10_S  | 0.90  | 1.05  | 0.90  | 1.03  | -0.48 | 0.05  |
| 1a2p_D_52_A  | 2.86  | -0.76 | -0.88 | -0.71 | 0.13  | 0.16  |
| 1a2p_D_52_N  | 1.78  | 0.22  | 0.13  | 0.12  | -0.36 | -0.60 |
| 1a2p_D_6_A   | 0.85  | 0.10  | 0.05  | 0.13  | -0.18 | -0.58 |
| 1a2p_D_6_G   | 1.30  | 0.89  | 0.46  | 0.20  | 0.43  | 0.02  |
| 1a2p_D_6_S   | 0.70  | 0.82  | 0.44  | 0.39  | 0.36  | 0.13  |
| 1a2p_E_27_A  | 1.20  | 0.06  | -0.20 | -0.12 | 0.88  | 1.17  |
| 1a2p_E_27_G  | 2.13  | 2.45  | 1.92  | 1.91  | 3.56  | 3.94  |
| 1a2p_E_27_S  | 1.20  | 1.27  | 1.34  | 1.20  | 2.85  | 3.73  |
| 1a2p_G_32_A  | 2.70  | 15.93 | 16.12 | 15.86 | 19.57 | 16.42 |
| 1a2p_G_32_D  | 3.20  | 4.39  | 5.05  | 5.10  | 6.51  | 6.44  |
| 1a2p_G_32_H  | 2.30  | 4.50  | 5.04  | 5.24  | 6.78  | 6.61  |
| 1a2p_G_32_K  | 2.70  | 3.62  | 4.06  | 3.94  | 11.79 | 10.22 |
| 1a2p_G_32_N  | 2.70  | 3.00  | 3.59  | 3.35  | 10.50 | 9.84  |
| 1a2p_G_32_R  | 2.80  | 3.90  | 4.31  | 4.18  | 6.04  | 6.35  |
| 1a2p_G_32_S  | 2.90  | 4.56  | 5.10  | 4.71  | 7.07  | 6.68  |
| 1a2p_G_32_T  | 3.20  | 7.88  | 8.29  | 8.02  | 11.67 | 10.99 |
| 1a2p_H_16_A  | 1.90  | 3.78  | 3.02  | 3.18  | 3.17  | 3.16  |
| 1a2p_H_16_D  | 2.20  | 3.07  | 2.89  | 3.00  | 3.69  | 3.49  |
| 1a2p_H_16_G  | 0.70  | 2.20  | 1.60  | 1.68  | -0.18 | 0.18  |
| 1a2p_H_16_K  | 0.90  | 1.80  | 1.51  | 1.55  | 1.22  | 1.45  |
| 1a2p_H_16_N  | 1.80  | 2.34  | 1.98  | 1.96  | 1.71  | 1.75  |
| 1a2p_H_16_R  | 1.00  | 2.04  | 1.88  | 1.83  | 1.87  | 2.28  |
| 1a2p_H_16_S  | 2.10  | 3.65  | 3.08  | 3.10  | 2.75  | 3.09  |
| 1a2p_I_107_A | 2.07  | 1.33  | 0.86  | 0.81  | 0.43  | 1.99  |
| 1a2p_I_107_V | 0.81  | 1.72  | 1.78  | 1.64  | 1.86  | 1.99  |
| 1a2p_I_23_A  | 3.68  | 4.58  | 4.35  | 4.55  | 4.59  | 4.14  |
| 1a2p_I_23_V  | 0.83  | 1.15  | 0.96  | 1.05  | 1.21  | 1.34  |
| 1a2p_I_2_A   | 0.75  | 3.29  | 2.94  | 3.15  | 3.40  | 2.98  |
| 1a2p_I_2_V   | 0.81  | 1.13  | 0.87  | 1.08  | 1.34  | 0.68  |
| 1a2p_I_49_A  | 4.72  | 2.83  | 2.74  | 2.77  | 2.49  | 2.33  |
| 1a2p_I_49_V  | 1.13  | 1.06  | 1.00  | 1.17  | 0.89  | 0.93  |
| 1a2p_I_53_A  | 1.48  | 0.84  | 0.81  | 0.78  | 0.73  | 0.79  |
| 1a2p_I_53_T  | 1.15  | 0.60  | 0.95  | 0.68  | 1.40  | 0.41  |
| 1a2p_I_53_V  | 0.63  | 0.09  | -0.10 | 0.00  | 0.28  | 0.03  |
| 1a2p_I_74_A  | 1.66  | 2.37  | 2.61  | 2.52  | 2.07  | 3.57  |
| 1a2p_I_74_V  | 0.98  | 1.07  | 0.86  | 0.76  | 0.45  | 1.16  |
| 1a2p_I_86_A  | 4.02  | 4.52  | 4.22  | 4.38  | 4.28  | 5.07  |
| 1a2p_I_86_V  | 1.64  | 2.30  | 2.31  | 2.15  | 1.83  | 2.27  |
| 1a2p_I_94_A  | 3.15  | 3.98  | 3.53  | 3.96  | 3.86  | 4.28  |
| 1a2p_I_94_V  | 1.02  | 0.37  | -0.13 | 0.08  | -0.09 | 0.61  |
| 1a2p_K_25_G  | 0.38  | 1.42  | 1.47  | 1.23  | -0.44 | 0.02  |
| 1a2p_K_60_R  | 0.32  | 0.63  | 0.59  | 0.63  | 3.21  | 5.02  |
| 1a2p_L_12_A  | 4.53  | 4.95  | 4.55  | 5.04  | 5.03  | 5.86  |
| 1a2p_L_31_Q  | 1.41  | 1.31  | 1.14  | 1.42  | 1.47  | 2.27  |
| 1a2p_L_87_T  | 3.28  | 4.05  | 3.85  | 3.73  | 4.78  | 5.45  |
| 1a2p_L_87_V  | 0.47  | 2.83  | 2.12  | 2.43  | 1.69  | 4.16  |
| 1a2p_N_21_A  | 2.20  | 0.00  | 0.05  | -0.04 | -0.76 | -0.65 |
| 1a2p_N_39_D  | 2.62  | 0.35  | 0.71  | 0.54  | 0.78  | 0.97  |
| 1a2p_N_3_A   | 1.59  | 2.12  | 2.04  | 1.99  | 1.56  | 2.41  |
| 1a2p_N_56_A  | 2.00  | 3.14  | 2.82  | 3.11  | 5.08  | 7.44  |
| 1a2p_N_56_D  | -0.31 | 3.13  | 3.02  | 3.12  | 5.36  | 5.09  |

|              |       |       |       |       |       |       |
|--------------|-------|-------|-------|-------|-------|-------|
| 1a2p_N_75_A  | 1.45  | 2.95  | 2.71  | 2.76  | 3.13  | 3.07  |
| 1a2p_N_82_A  | 1.59  | 3.59  | 3.38  | 3.25  | 4.24  | 5.00  |
| 1a2p_Q_29_A  | 0.19  | 1.48  | 1.25  | 1.00  | -0.16 | -0.15 |
| 1a2p_Q_29_G  | 1.10  | 2.72  | 2.49  | 2.32  | 1.94  | 1.45  |
| 1a2p_Q_29_S  | -0.30 | 2.15  | 2.34  | 2.02  | 1.52  | 1.28  |
| 1a2p_R_108_A | -0.19 | 1.31  | 0.76  | 0.88  | -0.41 | -0.06 |
| 1a2p_S_26_A  | -0.60 | -0.38 | -0.57 | -0.48 | -0.90 | -0.88 |
| 1a2p_S_26_G  | 0.50  | 0.25  | 0.07  | 0.39  | 0.33  | -0.08 |
| 1a2p_S_89_A  | 2.41  | 0.96  | 0.89  | 0.57  | 2.44  | 2.94  |
| 1a2p_S_90_A  | 3.22  | 0.01  | -0.19 | -0.14 | -0.92 | 0.26  |
| 1a2p_T_103_V | 2.14  | 1.72  | 1.52  | 1.45  | 0.53  | 2.09  |
| 1a2p_T_14_A  | 0.50  | 0.48  | 0.21  | 0.15  | -0.94 | -1.36 |
| 1a2p_T_14_G  | 1.30  | 1.97  | 1.60  | 1.86  | 1.32  | 1.07  |
| 1a2p_T_14_R  | -0.74 | -0.32 | 0.01  | -0.10 | -0.34 | -0.38 |
| 1a2p_T_14_S  | 1.36  | 0.98  | 1.04  | 1.36  | 1.34  | 0.55  |
| 1a2p_T_24_A  | 1.67  | 1.30  | 1.20  | 1.22  | 2.98  | 2.95  |
| 1a2p_T_24_D  | 0.00  | 2.30  | 2.45  | 2.49  | 5.06  | 5.29  |
| 1a2p_T_24_G  | 1.01  | 1.61  | 1.13  | 1.29  | 1.33  | 2.07  |
| 1a2p_T_24_S  | 0.54  | -0.16 | -0.21 | -0.19 | -0.22 | -0.03 |
| 1a2p_T_24_V  | 2.09  | 2.71  | 2.64  | 2.80  | 6.70  | 6.84  |
| 1a2p_T_4_A   | 2.02  | 1.31  | 1.17  | 1.41  | 3.32  | 3.57  |
| 1a2p_T_4_G   | 0.61  | 1.54  | 1.21  | 1.35  | 2.48  | 2.72  |
| 1a2p_T_4_P   | 3.30  | 4.41  | 3.40  | 3.61  | 5.10  | 5.28  |
| 1a2p_T_4_S   | 0.27  | 0.34  | 0.38  | 0.49  | 1.10  | 0.75  |
| 1a2p_T_97_V  | 2.92  | 3.59  | 3.63  | 3.43  | 4.01  | 4.89  |
| 1a2p_V_34_A  | 1.68  | 2.17  | 2.15  | 2.23  | 2.43  | 2.64  |
| 1a2p_V_34_T  | 1.05  | 1.05  | 1.17  | 1.17  | 2.04  | 0.44  |
| 1a2p_V_43_A  | 1.17  | 1.77  | 1.87  | 2.17  | 1.75  | 1.73  |
| 1a2p_V_43_T  | 2.22  | 1.71  | 1.87  | 1.69  | 1.97  | 2.32  |
| 1a2p_V_8_A   | 3.47  | 3.29  | 3.27  | 3.06  | 2.70  | 2.91  |
| 1a2p_V_8_T   | 1.99  | 1.47  | 1.81  | 1.71  | 2.85  | 2.76  |
| 1a2p_Y_101_F | 0.18  | -0.63 | -0.45 | -0.53 | -1.25 | 0.51  |
| 1a2p_Y_11_A  | 3.00  | 5.01  | 4.40  | 4.43  | 2.75  | 2.83  |
| 1a2p_Y_15_A  | 1.67  | 3.76  | 3.32  | 3.17  | 3.32  | 3.91  |
| 1a2p_Y_15_G  | 4.00  | 5.80  | 5.10  | 5.49  | 5.52  | 6.22  |
| 1a2p_Y_15_S  | 2.00  | 4.84  | 4.29  | 4.33  | 4.43  | 4.77  |
| 1a2p_Y_22_F  | -0.09 | 0.48  | 0.43  | 0.71  | 0.87  | 0.58  |
| 1a2p_Y_76_F  | 1.14  | 0.59  | 0.76  | 0.56  | 1.99  | 1.80  |
| 1bf4_A_44_G  | 1.27  | 2.52  | 1.99  | -0.86 | 1.04  | 1.00  |
| 1bf4_A_50_G  | 2.10  | 4.72  | 4.17  | 4.22  | 1.16  | 1.30  |
| 1bf4_D_34_A  | 0.54  | -1.14 | -3.63 | -1.68 | -1.94 | -1.52 |
| 1bf4_E_11_A  | 0.30  | 0.26  | -0.31 | -0.28 | -0.04 | -0.21 |
| 1bf4_F_31_A  | 2.70  | 10.21 | 7.43  | 9.56  | 9.36  | 9.83  |
| 1bf4_I_16_A  | 1.50  | 3.21  | 1.69  | 2.81  | 2.18  | 2.44  |
| 1bf4_I_29_A  | 2.57  | 4.58  | 4.09  | 4.12  | 4.94  | 5.21  |
| 1bf4_K_6_A   | 0.27  | 0.56  | -1.02 | -0.01 | 0.77  | 0.56  |
| 1bf4_L_54_A  | 3.92  | 7.72  | 7.04  | 6.26  | 4.89  | 5.61  |
| 1bf4_L_55_A  | 1.45  | 6.03  | 5.33  | 5.51  | 2.26  | 2.45  |
| 1bf4_L_58_A  | 0.67  | 5.04  | 0.20  | 1.34  | 2.04  | 2.42  |
| 1bf4_Q_56_G  | 0.70  | 0.70  | -1.94 | -0.05 | -0.17 | 0.14  |
| 1bf4_R_24_A  | 0.38  | 0.09  | -0.52 | -0.46 | -1.25 | -0.78 |
| 1bf4_R_42_A  | 0.56  | 0.08  | -0.52 | -1.42 | -2.83 | -3.11 |
| 1bf4_S_17_A  | 0.13  | 1.26  | -0.28 | -0.15 | 0.52  | 0.54  |
| 1bf4_S_30_A  | -0.72 | -0.46 | -1.33 | -1.26 | -1.50 | -0.93 |
| 1bf4_S_46_A  | -0.18 | -0.59 | -1.11 | -1.02 | -0.47 | -0.15 |
| 1bf4_T_40_A  | 0.84  | 0.99  | -0.38 | -1.28 | 1.07  | 1.26  |

|              |       |       |       |       |       |       |
|--------------|-------|-------|-------|-------|-------|-------|
| lbf4_V_14_A  | 2.29  | 3.18  | 1.89  | 2.87  | 3.31  | 3.84  |
| lbf4_V_22_A  | 0.23  | 3.02  | 0.77  | 1.77  | 3.54  | 3.59  |
| lbf4_V_3_A   | 2.12  | 7.93  | 6.65  | 7.65  | 5.27  | 5.46  |
| lbf4_V_45_A  | 1.63  | 2.70  | 1.35  | -0.49 | 3.25  | 3.15  |
| lbp_i_D_3_A  | -0.20 | -0.54 | -0.58 | -0.59 | -0.15 | -0.80 |
| lbp_i_D_50_A | 0.40  | -1.18 | -1.25 | -0.79 | -2.23 | -2.11 |
| lbp_i_E_49_A | 0.20  | 0.52  | 0.09  | 0.36  | 0.69  | -0.02 |
| lbp_i_E_7_A  | 1.50  | -0.20 | -0.50 | -0.33 | -0.39 | -0.95 |
| lbp_i_F_22_A | 2.00  | 5.56  | 5.33  | 5.24  | 4.51  | 4.76  |
| lbp_i_F_4_A  | 3.00  | 3.68  | 3.12  | 3.34  | 2.32  | 2.31  |
| lbp_i_I_18_A | 1.50  | 2.33  | 1.80  | 1.95  | -0.49 | -0.31 |
| lbp_i_I_19_A | 2.10  | 1.66  | 1.34  | 1.98  | 1.99  | 2.16  |
| lbp_i_K_15_A | 0.40  | 0.93  | 0.08  | 0.36  | 2.22  | 1.00  |
| lbp_i_K_26_A | 0.00  | -0.04 | -0.18 | -0.12 | -0.08 | -0.31 |
| lbp_i_K_41_A | 0.40  | 0.31  | 0.08  | 0.62  | 0.45  | -0.37 |
| lbp_i_K_46_A | -0.10 | 0.15  | 0.18  | 0.34  | 0.00  | -0.14 |
| lbp_i_L_29_A | 0.00  | 0.41  | 0.44  | 0.88  | -0.51 | -0.03 |
| lbp_i_L_6_A  | 0.60  | 1.06  | 0.75  | 0.97  | 1.19  | 0.67  |
| lbp_i_M_52_A | 1.70  | 0.83  | 1.02  | 0.67  | 1.12  | 0.13  |
| lbp_i_N_24_A | 2.20  | 2.32  | 1.97  | 1.86  | 1.98  | 0.94  |
| lbp_i_N_44_A | 3.30  | 0.24  | 0.06  | 0.14  | -4.37 | -5.26 |
| lbp_i_P_13_A | 1.20  | 1.34  | 2.22  | 2.18  | 2.14  | 0.94  |
| lbp_i_P_2_A  | 1.30  | 1.52  | 2.41  | 2.54  | 4.30  | 3.42  |
| lbp_i_P_8_A  | 0.30  | 1.56  | 2.03  | 2.20  | 3.54  | 2.30  |
| lbp_i_P_9_A  | 0.80  | 1.70  | 2.60  | 2.76  | 4.33  | 3.20  |
| lbp_i_Q_31_A | 1.00  | 1.90  | 1.51  | 1.39  | 1.63  | 0.89  |
| lbp_i_R_17_A | 0.30  | 1.01  | 0.52  | 0.58  | 0.98  | 0.72  |
| lbp_i_R_1_A  | 0.50  | -0.08 | -0.36 | -0.36 | 0.05  | 0.40  |
| lbp_i_R_20_A | 1.80  | 0.92  | 0.65  | 0.67  | -2.37 | -2.02 |
| lbp_i_R_39_A | 0.00  | 1.17  | 0.27  | 0.62  | 1.63  | 0.23  |
| lbp_i_R_42_A | 0.50  | 0.60  | 0.35  | 0.61  | 0.92  | -0.21 |
| lbp_i_R_53_A | 0.10  | 0.67  | 0.39  | 0.44  | -0.32 | -0.29 |
| lbp_i_S_47_A | 1.60  | 0.23  | 0.21  | 0.02  | 1.05  | 0.98  |
| lbp_i_T_11_A | 0.00  | 1.11  | 1.25  | 1.37  | 3.04  | 2.01  |
| lbp_i_T_32_A | 0.10  | 0.92  | 0.42  | 0.91  | 1.06  | 1.29  |
| lbp_i_T_54_A | 0.10  | -0.14 | 0.12  | -0.20 | 0.49  | 0.30  |
| lbp_i_V_34_A | 1.20  | 2.43  | 2.52  | 2.71  | 2.97  | 3.66  |
| lbp_i_Y_10_A | 1.20  | 3.57  | 2.86  | 2.73  | 4.04  | 3.67  |
| lbp_i_Y_35_A | 1.10  | 4.50  | 4.23  | 4.35  | 1.53  | 1.41  |
| lbvc_A_125_L | -0.40 | -0.25 | -0.10 | 0.45  | 0.41  | -0.08 |
| lbvc_A_130_K | 3.70  | 9.52  | 8.69  | 8.63  | 11.52 | 10.63 |
| lbvc_A_130_L | 2.30  | 8.97  | 9.40  | 9.67  | 11.01 | 9.49  |
| lbvc_A_144_L | -0.10 | -0.71 | -0.25 | -0.57 | 0.17  | 0.23  |
| lbvc_A_15_L  | -0.20 | -0.72 | -0.01 | -0.93 | -0.38 | 0.19  |
| lbvc_F_106_A | 0.20  | 3.57  | 3.56  | 3.21  | 1.62  | 2.82  |
| lbvc_F_123_A | 0.30  | 8.67  | 8.00  | 8.24  | 7.70  | 8.52  |
| lbvc_F_123_T | 3.50  | 9.20  | 8.34  | 8.67  | 8.98  | 9.63  |
| lbvc_G_129_A | -1.05 | -1.28 | -0.69 | -1.04 | -1.41 | -1.58 |
| lbvc_G_23_A  | 1.12  | 1.01  | 1.17  | 1.22  | -0.97 | -0.10 |
| lbvc_H_116_A | -0.16 | 0.90  | 0.30  | 0.16  | 0.05  | -0.38 |
| lbvc_H_93_G  | 0.01  | 3.97  | 3.09  | 3.46  | 2.81  | 3.41  |
| lbvc_I_142_A | 1.92  | 3.16  | 3.24  | 3.71  | 3.28  | 3.19  |
| lbvc_I_28_A  | 2.06  | 4.92  | 4.58  | 4.69  | 4.84  | 5.59  |
| lbvc_I_30_A  | 1.90  | 2.13  | 1.24  | 1.63  | 0.97  | 2.49  |
| lbvc_L_115_A | 1.00  | 3.19  | 2.90  | 3.28  | 3.32  | 4.81  |
| lbvc_L_11_A  | 0.47  | 3.50  | 3.31  | 3.27  | 3.19  | 3.33  |



|              |       |       |       |       |        |       |
|--------------|-------|-------|-------|-------|--------|-------|
| lbvc_L_135_A | 0.80  | 4.59  | 4.13  | 4.32  | 3.95   | 3.89  |
| lbvc_L_137_A | 1.78  | 1.85  | 1.01  | 1.32  | 1.16   | 0.78  |
| lbvc_L_149_A | 1.60  | 3.13  | 2.09  | 2.65  | 1.37   | 2.27  |
| lbvc_L_29_A  | 0.39  | 4.51  | 4.37  | 4.47  | 4.51   | 4.24  |
| lbvc_L_32_A  | 2.04  | 3.46  | 3.29  | 3.63  | 3.52   | 4.54  |
| lbvc_L_9_A   | 0.41  | 2.00  | 1.60  | 1.77  | 1.83   | 2.25  |
| lbvc_M_131_A | 2.20  | 3.04  | 3.09  | 3.07  | 3.20   | 3.30  |
| lbvc_N_132_G | 0.30  | -0.63 | -0.50 | -0.64 | -1.58  | -1.58 |
| lbvc_P_88_A  | -0.59 | 0.50  | 1.27  | 1.77  | 0.44   | 1.26  |
| lbvc_S_117_A | 0.26  | -0.58 | -0.65 | -0.89 | -1.52  | -0.83 |
| lbvc_T_51_A  | 1.41  | 0.21  | 0.02  | 0.67  | 0.62   | 0.52  |
| lbvc_T_67_A  | 0.26  | -0.73 | -0.53 | -0.65 | -1.65  | -1.53 |
| lbvc_V_114_A | 1.45  | 2.26  | 2.15  | 2.31  | 1.94   | 1.79  |
| lbvc_V_13_A  | 0.67  | 1.75  | 2.47  | 1.82  | 0.52   | 0.86  |
| lbvc_V_66_A  | -0.75 | 0.80  | 0.93  | 1.32  | 2.07   | 0.61  |
| lbvc_V_68_T  | 0.60  | 0.65  | 0.64  | 0.79  | 1.46   | 1.62  |
| lcey_A_47_G  | -0.20 | 1.65  | 1.22  | 0.99  | -0.28  | 0.83  |
| lcey_A_76_G  | 0.30  | -4.56 | -4.89 | -4.50 | -10.15 | -8.61 |
| lcey_A_79_G  | -0.60 | 0.08  | 0.12  | -0.20 | 1.11   | -1.15 |
| lcey_A_87_G  | -0.10 | 1.20  | 1.12  | 0.84  | 0.84   | 2.15  |
| lcey_A_89_G  | -0.50 | -1.14 | -0.99 | -1.44 | -0.97  | -2.72 |
| lensp_F_15_A | 2.27  | 3.91  | 3.31  | 3.56  | 2.43   | 3.14  |
| lensp_F_17_A | 1.53  | 3.34  | 2.74  | 2.99  | 2.76   | 3.24  |
| lensp_F_27_A | 0.76  | 4.69  | 4.09  | 4.34  | 4.57   | 4.10  |
| lensp_F_38_A | -0.15 | 1.39  | 0.82  | 1.07  | 1.28   | 1.00  |
| lcyo_F_35_L  | 1.87  | 2.53  | 2.28  | 2.34  | 1.13   | 0.72  |
| ldyb_G_131_V | -0.68 | -1.10 | -0.92 | -1.07 | -0.07  | -0.76 |
| ldyj_D_27_N  | -1.40 | -0.62 | -0.45 | -1.29 | -3.24  | -1.70 |
| ldyj_E_139_Q | 0.42  | 0.34  | -0.89 | -1.32 | -0.74  | 0.10  |
| ldyj_P_66_A  | -1.30 | -1.67 | 0.13  | -0.01 | 2.21   | 1.46  |
| ldyj_T_113_V | 1.20  | -0.18 | 1.50  | 0.40  | 0.93   | -0.52 |
| ldyj_V_75_A  | -0.10 | 2.20  | 3.40  | 4.04  | 2.94   | 3.07  |
| ldyj_V_88_A  | -0.20 | 1.63  | 2.75  | 1.87  | 2.12   | 3.05  |
| lfkj_E_60_A  | 2.13  | 0.07  | -0.24 | -0.39 | -2.50  | -2.66 |
| lfkj_E_60_G  | 2.84  | 2.06  | 1.75  | 1.71  | -0.14  | -0.38 |
| lfkj_E_61_A  | 0.84  | 1.22  | 1.25  | 1.32  | -0.80  | -0.85 |
| lfkj_E_61_G  | 2.49  | 2.28  | 2.84  | 1.86  | 0.14   | 0.83  |
| lfkj_F_36_A  | 3.54  | 7.28  | 6.29  | 6.70  | 7.49   | 8.37  |
| lfkj_I_56_A  | 2.48  | 3.48  | 3.45  | 3.37  | 2.66   | 2.60  |
| lfkj_I_56_D  | 3.16  | 4.93  | 4.91  | 5.85  | 5.48   | 5.56  |
| lfkj_I_56_T  | 1.81  | 3.75  | 3.83  | 3.34  | 3.68   | 3.77  |
| lfkj_I_76_A  | 3.81  | 5.45  | 5.35  | 4.59  | 6.34   | 6.38  |
| lfkj_I_76_V  | 0.76  | 1.92  | 0.88  | 1.45  | 1.03   | 1.12  |
| lfkj_I_7_V   | 0.92  | 0.28  | 0.23  | 0.65  | -0.35  | 0.68  |
| lfkj_I_91_A  | 1.54  | 5.27  | 6.02  | 5.40  | 5.58   | 6.67  |
| lfkj_I_91_V  | 0.38  | 1.26  | 1.04  | 0.84  | 0.96   | 1.37  |
| lfkj_L_106_A | 2.32  | 5.14  | 4.52  | 5.07  | 5.37   | 5.57  |
| lfkj_L_50_A  | 2.57  | 3.40  | 3.50  | 4.21  | 3.39   | 4.59  |
| lfkj_L_97_A  | 3.56  | 5.86  | 5.75  | 5.86  | 5.98   | 7.02  |
| lfkj_R_57_A  | 0.81  | 1.43  | 0.45  | 0.99  | 0.27   | -0.26 |
| lfkj_R_57_G  | 2.29  | 3.08  | 2.62  | 2.38  | 1.17   | 0.66  |
| lfkj_T_21_A  | 1.60  | 1.20  | 1.18  | 1.30  | 0.60   | 0.80  |
| lfkj_T_21_S  | 1.44  | 1.99  | 1.67  | 2.01  | 2.18   | 2.37  |
| lfkj_T_21_V  | -0.86 | -1.13 | -0.82 | -1.06 | -1.67  | -1.93 |
| lfkj_T_27_A  | 1.97  | 1.49  | 1.41  | 1.48  | -2.22  | -2.11 |
| lfkj_T_27_S  | 1.49  | 0.93  | 0.74  | 1.42  | -1.85  | -2.14 |

|              |       |       |       |       |       |       |
|--------------|-------|-------|-------|-------|-------|-------|
| 1fkj_T_27_V  | -0.23 | -1.79 | -2.44 | -1.64 | -4.03 | -4.46 |
| 1fkj_T_75_A  | 2.65  | 0.78  | 0.74  | 0.87  | 1.00  | 0.76  |
| 1fkj_T_75_V  | 0.81  | -1.85 | -1.46 | -1.68 | -2.82 | -2.65 |
| 1fkj_V_101_A | 2.75  | 3.63  | 4.01  | 4.17  | 4.47  | 4.89  |
| 1fkj_V_23_A  | 2.97  | 2.73  | 2.03  | 2.86  | 2.50  | 2.49  |
| 1fkj_V_24_A  | 3.19  | 1.73  | 1.78  | 1.53  | 1.71  | 3.11  |
| 1fkj_V_2_A   | 2.43  | 2.33  | 1.56  | 2.68  | 2.09  | 2.51  |
| 1fkj_V_4_A   | 2.78  | 3.68  | 2.89  | 3.94  | 3.74  | 4.06  |
| 1fkj_V_55_A  | 2.13  | 3.56  | 3.26  | 3.60  | 5.05  | 5.25  |
| 1fkj_V_63_A  | 2.97  | 2.31  | 2.32  | 2.45  | 2.44  | 1.79  |
| 1fkj_V_98_A  | 2.16  | 3.00  | 3.04  | 3.63  | 3.65  | 4.72  |
| 1fkj_W_59_F  | -2.72 | 2.01  | 1.70  | 1.61  | 0.85  | 1.38  |
| 1fkj_W_59_L  | -2.35 | 3.19  | 2.29  | 2.62  | 0.55  | 2.81  |
| 1fxa_E_94_Q  | -0.60 | -0.93 | -0.86 | -0.65 | -1.11 | -0.59 |
| 1fxa_F_65_A  | 1.00  | 3.68  | 3.13  | 3.27  | 1.85  | 2.49  |
| 1fxa_R_42_A  | 2.40  | 1.10  | 0.93  | 0.86  | -0.01 | 0.03  |
| 1fxa_T_48_A  | -0.10 | 0.07  | 0.06  | -0.04 | -0.92 | -1.86 |
| 1hfz_H_108_A | 0.79  | 3.50  | 3.50  | 3.69  | 2.21  | 0.29  |
| 1hfz_H_33_A  | 2.13  | 2.36  | 1.69  | 1.78  | 1.65  | 0.33  |
| 1hfz_Q_118_A | 0.96  | 0.85  | 0.53  | 0.32  | 0.47  | 0.45  |
| 1hfz_Q_55_A  | 0.41  | -0.47 | 0.05  | -0.35 | 0.22  | -1.78 |
| 1hfz_V_43_A  | 0.93  | -0.02 | 0.91  | 0.89  | 1.48  | 0.87  |
| 1hfz_V_43_G  | 1.15  | 0.93  | 1.06  | 1.61  | 2.04  | 1.94  |
| 1hfz_Y_104_A | 2.39  | 6.41  | 5.67  | 5.72  | 5.48  | 6.80  |
| 1hz6_A_11_G  | 2.43  | 3.71  | 3.41  | 3.53  | 3.00  | 3.04  |
| 1hz6_A_32_G  | 2.54  | 2.83  | 2.90  | 2.97  | 3.06  | 3.35  |
| 1hz6_A_36_G  | 3.10  | 3.20  | 2.85  | 2.97  | 3.27  | 3.59  |
| 1hz6_A_38_G  | 1.32  | 1.57  | 0.90  | 1.31  | 1.66  | 1.88  |
| 1hz6_A_40_G  | 3.12  | 3.83  | 3.47  | 3.61  | 3.94  | 3.95  |
| 1hz6_A_55_G  | 0.49  | 0.71  | -0.12 | 0.66  | -1.17 | -1.23 |
| 1hz6_D_41_A  | 1.21  | -0.13 | -0.89 | -0.73 | -2.43 | -2.62 |
| 1hz6_D_41_G  | 2.14  | 1.81  | 0.99  | 0.81  | -0.85 | -0.52 |
| 1hz6_D_53_A  | 0.20  | 1.76  | 1.06  | 0.84  | 0.34  | 0.66  |
| 1hz6_E_24_A  | 0.59  | 1.20  | 0.75  | 0.85  | 0.16  | 0.29  |
| 1hz6_E_35_G  | 1.19  | 1.61  | 1.52  | 1.48  | 0.74  | 0.79  |
| 1hz6_E_49_A  | 0.23  | -0.51 | -0.29 | -0.37 | -0.34 | -0.51 |
| 1hz6_F_15_A  | 3.12  | 6.02  | 5.44  | 5.74  | 5.40  | 5.96  |
| 1hz6_F_15_L  | 0.68  | 4.10  | 3.58  | 4.06  | 3.86  | 3.99  |
| 1hz6_F_25_A  | 4.25  | 6.74  | 6.87  | 6.83  | 6.04  | 7.04  |
| 1hz6_F_25_L  | 3.12  | 6.85  | 6.92  | 6.41  | 7.50  | 6.65  |
| 1hz6_F_29_G  | 3.08  | 6.60  | 5.77  | 6.40  | 5.82  | 6.54  |
| 1hz6_F_29_L  | 0.38  | 2.38  | 1.84  | 2.48  | 2.17  | 2.48  |
| 1hz6_F_65_L  | 3.34  | 8.70  | 8.61  | 8.42  | 6.73  | 6.50  |
| 1hz6_I_14_A  | 1.37  | 2.23  | 2.19  | 2.36  | 2.96  | 3.45  |
| 1hz6_I_14_V  | 0.47  | 0.07  | 0.07  | -0.16 | -0.48 | 0.10  |
| 1hz6_I_63_A  | 4.72  | 7.08  | 6.82  | 7.15  | 8.25  | 8.21  |
| 1hz6_I_63_V  | 1.69  | 2.79  | 2.35  | 2.49  | 2.36  | 2.34  |
| 1hz6_I_9_A   | 4.90  | 4.53  | 4.52  | 4.95  | 5.06  | 5.98  |
| 1hz6_I_9_V   | 0.56  | 1.36  | 0.98  | 0.80  | 1.20  | 1.40  |
| 1hz6_K_10_A  | 0.92  | 1.28  | 1.37  | 1.50  | 1.33  | 1.33  |
| 1hz6_K_26_A  | 1.13  | 0.75  | 1.03  | 0.72  | 0.46  | 0.49  |
| 1hz6_K_31_G  | -0.16 | 1.72  | 1.44  | 1.30  | 1.57  | 1.60  |
| 1hz6_K_44_A  | -0.58 | 0.87  | 0.66  | 1.27  | -1.00 | -0.61 |
| 1hz6_K_45_A  | -0.35 | 0.25  | 0.01  | 0.15  | -0.20 | -0.30 |
| 1hz6_K_57_A  | 0.09  | 0.68  | 1.04  | 0.74  | 1.25  | 1.01  |
| 1hz6_K_64_A  | 0.45  | 1.39  | 1.62  | 1.27  | 1.58  | 1.46  |

|              |       |       |       |       |       |       |
|--------------|-------|-------|-------|-------|-------|-------|
| 1hz6_L_13_A  | 3.12  | 4.45  | 4.34  | 4.42  | 4.26  | 4.71  |
| 1hz6_L_43_A  | 2.44  | 3.20  | 2.41  | 2.89  | 2.92  | 3.08  |
| 1hz6_L_61_A  | 3.77  | 4.58  | 3.98  | 4.62  | 4.61  | 5.20  |
| 1hz6_N_12_A  | 1.87  | 0.54  | 0.46  | 0.36  | -0.24 | 0.13  |
| 1hz6_N_17_A  | 1.78  | 1.33  | 0.92  | 1.04  | 1.01  | 1.03  |
| 1hz6_N_47_A  | 0.34  | 0.63  | 0.68  | 0.55  | 0.22  | 0.28  |
| 1hz6_N_62_A  | 1.73  | 0.39  | 0.43  | 0.25  | -0.07 | 0.25  |
| 1hz6_S_19_A  | 0.30  | 0.47  | 0.09  | 0.42  | 0.24  | 0.13  |
| 1hz6_S_34_A  | -0.41 | -0.76 | -0.68 | -0.77 | -1.86 | -1.44 |
| 1hz6_S_34_G  | 0.82  | 1.10  | 0.09  | 0.33  | -0.18 | 0.42  |
| 1hz6_T_20_A  | 1.17  | 1.03  | 0.98  | 0.79  | 0.90  | 1.18  |
| 1hz6_T_22_A  | 1.11  | 1.28  | 1.04  | 1.56  | 1.19  | 1.20  |
| 1hz6_T_28_A  | 1.25  | -0.35 | -0.28 | -0.42 | -0.26 | -0.12 |
| 1hz6_T_33_A  | 1.09  | 0.19  | 0.07  | -0.18 | -2.18 | -1.66 |
| 1hz6_T_42_G  | 0.17  | 0.15  | -0.35 | 0.10  | -0.34 | 0.14  |
| 1hz6_T_51_A  | 0.97  | 0.70  | 0.98  | 1.47  | 0.75  | 0.99  |
| 1hz6_T_60_A  | 1.83  | 1.51  | 1.12  | 1.17  | 1.58  | 1.83  |
| 1hz6_T_8_A   | 1.63  | 0.96  | 1.10  | 0.94  | 1.24  | 1.31  |
| 1hz6_V_52_A  | 0.92  | 3.08  | 2.67  | 2.34  | 2.39  | 2.58  |
| 1hz6_V_54_A  | 1.14  | 1.74  | 1.47  | 1.70  | 1.39  | 1.21  |
| 1hz6_V_7_A   | 1.22  | 2.82  | 2.99  | 3.43  | 3.45  | 3.68  |
| 1hz6_Y_37_G  | 2.82  | 4.91  | 4.72  | 4.39  | 4.35  | 4.94  |
| 1hz6_Y_39_A  | 2.46  | 3.08  | 2.34  | 2.82  | 2.46  | 2.62  |
| 1hz6_Y_59_A  | 1.66  | 4.40  | 3.87  | 3.96  | 4.40  | 4.28  |
| 1hz6_Y_59_L  | -0.43 | 2.02  | 1.73  | 1.60  | 1.94  | 1.91  |
| lffc_L_64_A  | 2.07  | 3.56  | 2.80  | 3.23  | 3.69  | 3.73  |
| lffc_L_64_G  | 2.63  | 5.56  | 5.20  | 5.39  | 6.12  | 6.86  |
| liob_K_97_G  | 1.20  | 0.73  | 0.33  | 1.41  | 0.65  | -0.59 |
| liob_T_9_A   | 0.80  | 0.27  | 0.61  | 1.16  | 0.35  | 2.11  |
| liob_T_9_G   | 2.60  | 3.94  | 3.14  | 3.20  | 2.06  | 4.01  |
| 1100_A_105_Q | -0.60 | -0.81 | -0.78 | -0.50 | -0.81 | 0.84  |
| 1102_A_157_T | -0.50 | -2.76 | -1.72 | -1.79 | -3.45 | -4.59 |
| 1108_G_157_T | -1.10 | -1.70 | -1.44 | -1.11 | 0.51  | 0.84  |
| 1121_G_55_N  | -0.60 | 0.79  | 1.67  | 1.90  | 1.72  | 2.20  |
| 1122_G_124_K | -0.10 | -0.05 | 0.44  | -0.07 | 1.75  | 2.73  |
| 1133_A_131_V | 0.39  | 0.03  | -0.03 | 0.28  | 1.24  | 1.00  |
| 1160_A_113_G | 0.30  | 0.87  | 0.33  | 0.31  | 0.53  | 0.65  |
| 1165_A_47_D  | -0.95 | -0.32 | 0.33  | 0.68  | 6.40  | 2.68  |
| 1166_A_43_K  | -1.03 | -1.39 | -0.98 | -1.30 | 3.86  | -1.78 |
| 1167_A_46_L  | -1.86 | -3.28 | -2.96 | -3.16 | -2.21 | -6.21 |
| 1168_A_44_S  | 0.34  | 0.60  | 0.79  | 0.73  | -7.16 | -4.99 |
| 1169_A_133_L | -4.30 | -3.24 | -2.77 | -2.66 | -2.33 | -2.88 |
| 1185_A_153_F | -3.80 | -2.81 | -2.62 | -2.81 | -0.87 | -0.79 |
| 1190_A_99_L  | -4.50 | -4.73 | -4.28 | -4.55 | -5.46 | -5.66 |
| 1199_G_105_Q | -1.50 | -1.35 | -0.89 | -0.98 | 0.70  | -2.84 |
| llyh_G_59_T  | -1.60 | -1.08 | -0.69 | -0.92 | -0.72 | 1.37  |
| llyj_A_59_T  | -1.50 | -0.37 | -0.55 | -0.38 | 1.04  | 0.58  |
| lmjc_F_17_L  | 1.00  | 2.20  | 1.98  | 2.02  | 3.58  | 3.60  |
| lmjc_F_19_L  | 0.31  | 2.07  | 1.84  | 1.89  | 2.99  | 3.09  |
| lmjc_F_30_L  | 0.66  | 2.34  | 2.12  | 2.16  | 1.98  | 2.06  |
| lpga_A_20_G  | 2.39  | 1.49  | 1.31  | 1.34  | 0.52  | 0.23  |
| lpga_A_26_G  | 2.96  | 3.66  | 3.46  | 3.51  | 4.86  | 4.34  |
| lpga_A_34_G  | 2.48  | 2.94  | 2.75  | 2.82  | 3.26  | 3.33  |
| lpga_D_22_A  | 1.75  | 0.03  | -0.22 | -0.24 | -0.65 | -0.51 |
| lpga_D_46_A  | 1.74  | 1.04  | 0.76  | 0.77  | 0.34  | 0.33  |
| lpga_D_47_A  | -0.49 | -1.27 | -1.50 | -1.47 | -2.02 | -2.01 |

|              |       |       |       |       |       |       |
|--------------|-------|-------|-------|-------|-------|-------|
| lpga_E_15_A  | 0.47  | 1.53  | 1.23  | 1.28  | 0.34  | -0.36 |
| lpga_F_30_L  | 1.42  | 2.15  | 2.41  | 2.39  | 0.19  | 1.51  |
| lpga_F_52_L  | 3.54  | 7.54  | 7.09  | 7.16  | 6.72  | 6.58  |
| lpga_G_41_A  | 2.84  | 9.14  | 9.31  | 9.38  | 12.37 | 11.21 |
| lpga_I_6_A   | 2.09  | 2.60  | 2.28  | 2.56  | 3.01  | 2.90  |
| lpga_K_28_G  | 0.05  | 1.31  | 0.81  | 1.01  | 1.24  | 0.61  |
| lpga_K_31_G  | 2.02  | 2.71  | 2.26  | 2.35  | 1.43  | 1.91  |
| lpga_L_7_A   | 1.85  | 2.93  | 2.56  | 2.82  | 3.67  | 4.50  |
| lpga_N_35_G  | 2.50  | 0.93  | 0.44  | 0.51  | -0.24 | -0.94 |
| lpga_N_37_A  | -0.17 | 0.14  | -0.02 | 0.08  | -0.63 | -0.94 |
| lpga_Q_32_G  | 1.00  | 1.29  | 0.88  | 0.87  | 1.34  | 1.00  |
| lpga_T_11_A  | 0.60  | 0.52  | 0.38  | 0.48  | 0.78  | 0.96  |
| lpga_T_16_A  | 0.38  | 2.26  | 2.13  | 2.23  | 3.36  | 3.52  |
| lpga_T_18_A  | 0.46  | 0.19  | 0.07  | 0.16  | 0.10  | 0.16  |
| lpga_T_25_A  | -0.22 | 0.39  | 0.36  | 0.33  | 0.37  | -0.35 |
| lpga_T_49_A  | 0.72  | 0.94  | 0.85  | 0.96  | 0.56  | 0.84  |
| lpga_T_51_A  | 1.87  | 1.33  | 1.43  | 1.35  | 2.54  | 2.42  |
| lpga_T_53_A  | 1.91  | 0.18  | 0.07  | 0.13  | -0.41 | -0.15 |
| lpga_V_29_A  | 0.70  | 0.99  | 0.95  | 1.02  | 1.25  | 0.34  |
| lpga_V_39_A  | 1.72  | 3.23  | 3.22  | 3.29  | 3.72  | 3.65  |
| lpga_V_54_A  | 2.93  | 1.48  | 1.48  | 1.52  | 2.48  | 3.18  |
| lpga_Y_33_A  | 0.92  | 2.95  | 2.52  | 2.57  | 2.47  | 2.24  |
| lpga_Y_3_L   | 1.62  | 6.46  | 6.29  | 6.25  | 5.07  | 5.09  |
| lpga_Y_45_L  | 3.34  | 3.42  | 3.03  | 2.72  | 1.71  | 1.53  |
| lqhe_A_83_G  | 1.80  | 2.93  | 2.40  | 2.55  | 3.02  | 3.01  |
| lqhe_D_125_K | -1.01 | 0.44  | 0.06  | -0.05 | 0.08  | -0.22 |
| lqhe_D_149_K | 0.28  | -0.23 | -0.28 | -0.44 | 0.00  | -0.05 |
| lqhe_D_42_A  | -0.10 | 0.00  | 0.00  | 0.17  | 0.29  | 0.22  |
| lqhe_D_64_K  | 0.26  | -0.88 | -0.41 | -1.15 | -1.51 | -1.12 |
| lqhe_D_74_K  | -1.00 | -1.66 | -1.79 | -1.60 | -2.05 | -1.13 |
| lqhe_E_19_K  | -1.60 | -0.67 | -0.88 | -0.37 | -1.04 | -1.17 |
| lqhe_E_39_K  | -2.21 | -1.00 | -0.68 | -0.56 | -1.30 | -1.22 |
| lqhe_E_60_K  | -0.88 | -1.87 | -1.76 | -1.95 | -3.33 | -2.51 |
| lqhe_E_71_K  | -1.28 | -0.76 | -1.37 | -0.67 | -1.77 | -1.41 |
| lqhe_F_6_L   | 0.04  | 7.04  | 6.35  | 6.93  | 5.92  | 5.08  |
| lqhe_H_33_A  | 0.83  | 5.84  | 5.60  | 5.39  | 4.33  | 4.48  |
| lqhe_I_103_V | 0.56  | 0.87  | 0.40  | 0.79  | 1.07  | -0.67 |
| lqhe_I_155_V | 3.60  | 0.26  | 0.24  | 0.46  | -0.70 | -0.02 |
| lqhe_I_21_V  | 1.39  | 2.59  | 2.35  | 2.49  | 2.82  | 2.82  |
| lqhe_I_50_V  | 1.83  | 1.71  | 1.68  | 1.66  | 1.81  | 1.72  |
| lqhe_I_51_V  | 1.40  | 1.41  | 1.15  | 0.89  | 1.54  | 1.78  |
| lqhe_L_142_A | 0.10  | 3.74  | 3.64  | 3.66  | 3.19  | 3.87  |
| lqhe_L_5_A   | 2.94  | 5.47  | 5.15  | 5.41  | 5.87  | 6.55  |
| lqhe_N_96_A  | 0.46  | 1.59  | 1.48  | 1.79  | 0.34  | 0.46  |
| lqhe_Q_98_A  | -1.72 | 1.59  | 1.15  | 1.48  | -1.75 | -1.33 |
| lqhe_S_109_A | 0.64  | -0.19 | -0.78 | 0.02  | -0.63 | -0.74 |
| lqhe_V_116_A | 1.74  | 0.54  | 0.87  | 0.89  | 2.42  | 3.07  |
| lqhe_V_138_A | 0.87  | -0.74 | -0.25 | -0.37 | -1.67 | -1.27 |
| lqhe_V_159_A | 1.91  | 2.72  | 3.47  | 3.29  | 3.13  | 2.88  |
| lqhe_V_30_A  | 1.72  | 4.03  | 3.77  | 3.47  | 3.69  | 3.49  |
| lqhe_Y_46_F  | 0.59  | 0.96  | 0.91  | 0.99  | 0.95  | 0.96  |
| lrex_I_106_A | 0.93  | 3.55  | 3.31  | 3.67  | 3.10  | 2.93  |
| lrex_I_106_V | 0.72  | 2.23  | 2.12  | 2.56  | 2.58  | 2.68  |
| lrex_I_23_A  | 2.54  | 4.67  | 4.29  | 4.60  | 4.49  | 5.15  |
| lrex_I_23_V  | 0.36  | 1.20  | 0.72  | 1.28  | 0.83  | 1.24  |
| lrex_I_56_A  | 3.71  | 4.72  | 4.17  | 3.96  | 3.92  | 4.22  |

|              |       |       |       |       |       |       |
|--------------|-------|-------|-------|-------|-------|-------|
| lrex_I_56_L  | 0.10  | 0.19  | -0.25 | 0.31  | -0.35 | -0.12 |
| lrex_I_56_M  | 1.77  | 1.54  | 1.56  | 1.59  | 1.86  | 1.95  |
| lrex_I_56_T  | 3.64  | 4.31  | 3.47  | 4.20  | 5.05  | 5.10  |
| lrex_I_56_V  | 1.20  | 2.49  | 2.12  | 2.21  | 3.34  | 3.20  |
| lrex_I_59_A  | 1.72  | 4.82  | 4.08  | 4.79  | 5.39  | 5.23  |
| lrex_I_59_G  | 3.83  | 6.67  | 6.37  | 6.56  | 7.41  | 7.48  |
| lrex_I_59_L  | 0.00  | 0.51  | 0.48  | 0.74  | 0.81  | 0.16  |
| lrex_I_59_M  | 1.29  | 2.89  | 2.87  | 3.21  | 3.75  | 3.01  |
| lrex_I_59_S  | 3.59  | 5.62  | 5.10  | 5.71  | 6.90  | 6.67  |
| lrex_I_59_T  | 2.22  | 4.97  | 4.79  | 5.05  | 5.85  | 5.57  |
| lrex_I_59_V  | 1.10  | 2.58  | 2.16  | 2.04  | 2.75  | 2.41  |
| lrex_I_89_A  | 2.70  | 3.75  | 3.52  | 4.15  | 3.63  | 3.40  |
| lrex_I_89_V  | 0.48  | 1.86  | 1.81  | 2.10  | 2.35  | 1.99  |
| lrex_S_24_A  | 0.53  | 1.10  | 0.26  | 0.18  | 0.63  | 0.57  |
| lrex_S_36_A  | 1.12  | 1.35  | 1.44  | 1.74  | 4.20  | 4.62  |
| lrex_S_51_A  | 0.24  | 2.85  | 3.01  | 3.17  | 2.72  | 2.70  |
| lrex_S_61_A  | 1.36  | 2.41  | 2.37  | 2.68  | 5.10  | 4.81  |
| lrex_S_80_A  | -0.48 | 0.13  | -0.02 | -0.15 | 0.73  | 0.82  |
| lrex_T_11_A  | -0.38 | -0.32 | 0.03  | 0.14  | -0.83 | -0.81 |
| lrex_T_11_V  | -0.31 | -1.29 | -1.16 | -1.16 | -1.34 | -1.58 |
| lrex_T_40_A  | 1.51  | 0.26  | 0.12  | 0.01  | -0.49 | -0.05 |
| lrex_T_40_V  | 1.34  | 1.90  | 2.07  | 1.61  | 3.86  | 3.46  |
| lrex_T_43_A  | 0.36  | 0.40  | 0.41  | 0.38  | 0.06  | 0.04  |
| lrex_T_43_V  | -0.96 | -0.44 | -0.33 | -0.09 | -0.27 | -0.43 |
| lrex_T_52_A  | 0.91  | 0.77  | 0.95  | 0.56  | 0.53  | 1.04  |
| lrex_T_70_V  | 0.69  | 4.45  | 4.57  | 4.59  | 10.20 | 10.27 |
| lrex_V_100_A | 0.26  | 0.51  | 0.93  | 0.63  | -0.23 | -0.18 |
| lrex_V_110_A | -0.53 | -0.40 | -0.38 | -0.52 | -0.72 | -0.82 |
| lrex_V_121_A | 1.44  | 1.22  | 1.30  | 2.05  | 1.36  | 1.38  |
| lrex_V_125_A | 1.32  | 2.70  | 2.47  | 3.14  | 3.12  | 3.30  |
| lrex_V_2_A   | 1.51  | 1.95  | 1.99  | 1.86  | 2.74  | 2.70  |
| lrex_V_74_A  | 0.36  | 1.18  | 1.30  | 1.21  | 1.73  | 1.45  |
| lrex_V_93_A  | 0.74  | -0.27 | 0.36  | 0.22  | -0.44 | 0.14  |
| lrex_V_99_A  | 0.98  | 2.17  | 2.43  | 2.54  | 1.49  | 1.48  |
| lrex_Y_124_F | 0.36  | -0.24 | -0.26 | -0.37 | -0.27 | -0.41 |
| lrex_Y_20_F  | 0.50  | -0.71 | -0.42 | -0.19 | 0.60  | 0.56  |
| lrex_Y_38_F  | 0.19  | -0.07 | 0.62  | 0.15  | -0.42 | -1.19 |
| lrex_Y_45_F  | -0.07 | -0.01 | -0.30 | -0.61 | -0.50 | -0.70 |
| lrex_Y_54_F  | 0.96  | -0.46 | 0.09  | -0.04 | -0.04 | -0.19 |
| lrex_Y_63_F  | 0.24  | -0.07 | 0.10  | 0.02  | 0.14  | -0.26 |
| lrm1_D_48_A  | 0.50  | 0.89  | 0.61  | 0.59  | 1.31  | 1.22  |
| lrm1_D_75_A  | 3.70  | -0.26 | -0.23 | -0.37 | -2.42 | -2.51 |
| lrm1_D_75_N  | 2.87  | 0.73  | 0.22  | 0.25  | -2.54 | -1.27 |
| lrm1_E_57_A  | 0.64  | -0.80 | -1.05 | -0.93 | -4.85 | -4.12 |
| lrm1_N_35_A  | -0.03 | 0.63  | 0.52  | 0.52  | 1.15  | 0.85  |
| lrm1_N_43_A  | 2.00  | 1.67  | 1.39  | 1.51  | 2.44  | 2.30  |
| lrm1_N_43_D  | 2.00  | 1.19  | 1.34  | 1.37  | 1.40  | 1.03  |
| lrm1_N_80_A  | 2.87  | 2.72  | 2.67  | 2.68  | 3.34  | 3.96  |
| lrm1_N_8_A   | 0.90  | 0.02  | 0.09  | -0.01 | -0.55 | -0.20 |
| lrm1_P_38_A  | 4.33  | 3.40  | 4.24  | 4.45  | 4.97  | 4.51  |
| lrm1_S_11_A  | 1.23  | 1.32  | 1.31  | 1.29  | 1.58  | 1.67  |
| lrm1_S_16_A  | -0.67 | -0.59 | -0.87 | -0.52 | -1.42 | -1.27 |
| lrm1_S_63_A  | 1.44  | 0.74  | 0.47  | 0.61  | 0.74  | 0.81  |
| lrm1_Y_10_F  | 2.11  | 0.85  | 1.05  | 0.91  | 0.76  | 0.31  |
| lrm1_Y_41_F  | -1.14 | -0.52 | -0.29 | -0.53 | -0.31 | -1.23 |
| lrm1_Y_55_F  | 0.78  | -0.81 | -0.56 | -0.82 | -1.87 | -1.25 |

|              |       |       |       |       |       |       |
|--------------|-------|-------|-------|-------|-------|-------|
| 1rn1_Y_56_F  | 0.50  | 0.84  | 0.99  | 0.80  | 1.54  | 1.31  |
| 1rn1_Y_67_F  | 1.36  | -0.70 | -0.61 | -0.56 | -1.78 | -1.69 |
| 1shf_E_24_A  | 1.27  | -0.32 | -0.53 | -0.50 | -2.33 | -0.02 |
| 1shf_E_24_Q  | 0.74  | 0.99  | 0.97  | 1.11  | 3.28  | 4.19  |
| 1shf_S_41_A  | 0.71  | 0.86  | 0.70  | 0.81  | 3.02  | 3.86  |
| 1shf_S_41_G  | 1.68  | 3.51  | 3.14  | 3.28  | 5.84  | 6.94  |
| 1shg_A_50_G  | 2.00  | 2.57  | 2.23  | 2.27  | 2.74  | 2.87  |
| 1shg_A_6_G   | 1.40  | 3.61  | 3.36  | 3.39  | 3.02  | 3.24  |
| 1shg_D_24_A  | 1.20  | -0.53 | -0.86 | -0.83 | -0.92 | -0.42 |
| 1shg_D_43_G  | -1.40 | 1.37  | 0.88  | 0.95  | 0.06  | -0.18 |
| 1shg_F_47_A  | 2.70  | 4.10  | 3.48  | 3.73  | 0.57  | 1.53  |
| 1shg_K_38_A  | 1.00  | 2.36  | 2.07  | 2.14  | 1.42  | 1.54  |
| 1shg_M_20_A  | 2.50  | 4.00  | 3.75  | 3.89  | 2.76  | 2.91  |
| 1shg_N_42_A  | 0.30  | 2.47  | 2.18  | 2.23  | 2.24  | 2.43  |
| 1shg_N_42_G  | -0.40 | -1.00 | -1.42 | -1.34 | -0.37 | -0.16 |
| 1shg_T_19_A  | 1.10  | 0.45  | 0.25  | 0.35  | 1.50  | 1.69  |
| 1shg_V_18_A  | 2.00  | 2.34  | 2.30  | 2.36  | 2.05  | 2.49  |
| 1shg_V_39_A  | 3.40  | 4.06  | 4.01  | 4.07  | 3.95  | 3.53  |
| 1shg_V_41_A  | 0.90  | 3.18  | 2.94  | 3.00  | 3.13  | 3.33  |
| 1shg_V_48_A  | 2.20  | 3.66  | 3.59  | 3.65  | 3.31  | 3.63  |
| 1shg_V_53_A  | 2.40  | 2.75  | 2.96  | 3.02  | 2.61  | 3.28  |
| 1stn_A_104_G | 1.00  | 2.02  | 1.88  | 2.13  | -4.12 | -3.63 |
| 1stn_A_107_F | 1.45  | 0.94  | 1.01  | 1.30  | 3.39  | 2.97  |
| 1stn_A_107_G | 0.00  | 0.60  | 0.91  | 0.76  | -1.47 | -1.05 |
| 1stn_A_107_V | 1.50  | 4.31  | 4.10  | 3.53  | 4.41  | 4.82  |
| 1stn_A_125_G | 1.10  | 1.08  | 1.02  | 0.56  | 1.77  | 0.56  |
| 1stn_A_125_V | 1.20  | -0.19 | 0.83  | -0.44 | 0.26  | -1.12 |
| 1stn_A_127_G | 3.70  | 1.93  | 3.02  | 2.19  | 1.95  | 1.75  |
| 1stn_A_12_G  | 0.30  | 2.21  | 2.51  | 1.56  | 3.24  | 1.67  |
| 1stn_A_12_V  | 1.90  | -0.46 | -0.98 | 0.02  | -0.79 | 0.03  |
| 1stn_A_53_G  | 2.60  | 2.98  | 3.07  | 2.84  | 3.48  | 3.29  |
| 1stn_A_53_V  | 2.80  | 5.54  | 5.85  | 5.95  | 4.32  | 2.38  |
| 1stn_A_55_F  | 0.80  | -0.95 | -0.41 | 0.44  | 0.22  | 0.48  |
| 1stn_A_55_G  | 1.40  | 0.47  | 1.14  | 1.28  | 1.35  | 1.25  |
| 1stn_A_55_V  | 2.80  | 0.81  | 1.75  | 0.16  | 0.00  | 0.67  |
| 1stn_A_64_G  | 2.00  | 3.65  | 2.32  | 2.16  | 0.68  | 2.66  |
| 1stn_A_64_T  | 3.08  | 3.70  | 2.65  | 3.78  | 4.43  | 2.38  |
| 1stn_A_7_G   | 2.40  | 2.89  | 2.98  | 2.95  | 1.41  | 2.23  |
| 1stn_A_7_V   | 1.10  | -0.51 | -0.95 | -0.18 | 0.02  | -0.72 |
| 1stn_A_85_G  | 2.00  | 0.63  | 0.71  | 0.48  | -0.69 | -0.56 |
| 1stn_A_85_S  | 2.00  | 0.07  | 0.27  | 1.27  | 2.02  | 1.30  |
| 1stn_A_89_G  | 2.40  | 4.36  | 3.87  | 3.56  | 2.21  | 3.20  |
| 1stn_A_89_V  | 1.30  | -0.27 | 0.14  | -0.05 | -1.66 | -1.40 |
| 1stn_A_97_F  | 1.90  | 0.57  | 0.27  | 1.11  | 2.33  | 0.63  |
| 1stn_A_97_G  | 1.30  | 2.20  | 2.28  | 2.23  | 3.07  | 2.85  |
| 1stn_D_14_A  | 0.10  | 2.33  | 1.72  | 2.00  | 3.29  | 4.48  |
| 1stn_D_14_G  | 0.40  | 1.58  | 1.26  | 2.37  | 1.89  | 4.07  |
| 1stn_D_16_A  | -0.70 | 0.53  | -0.85 | -0.37 | -0.95 | -0.77 |
| 1stn_D_16_G  | -0.30 | 1.31  | 0.47  | 0.96  | -0.31 | -1.34 |
| 1stn_D_35_A  | -0.20 | 0.88  | -0.41 | -0.52 | -0.38 | -1.04 |
| 1stn_D_35_G  | 0.50  | 2.16  | 1.46  | 1.05  | 0.82  | 2.21  |
| 1stn_D_72_A  | 3.10  | 1.10  | 0.83  | 1.69  | 2.61  | 4.03  |
| 1stn_D_72_G  | 2.20  | 2.31  | 1.84  | 1.49  | 0.55  | 1.33  |
| 1stn_D_78_A  | 3.80  | 4.35  | 3.92  | 3.59  | 6.18  | 6.40  |
| 1stn_D_78_F  | 5.20  | 5.24  | 5.39  | 4.90  | 9.40  | 11.13 |
| 1stn_D_78_G  | 2.70  | 3.51  | 3.65  | 3.16  | 4.15  | 6.10  |

|              |       |       |       |       |       |       |
|--------------|-------|-------|-------|-------|-------|-------|
| 1stn_D_90_A  | 3.30  | 1.20  | 0.38  | 0.80  | 2.84  | 1.86  |
| 1stn_D_90_F  | 5.30  | 1.68  | 1.18  | 1.41  | 2.03  | 1.88  |
| 1stn_D_90_G  | 2.70  | 1.01  | 0.34  | 0.21  | 0.49  | 0.26  |
| 1stn_E_117_A | 0.40  | 1.30  | 0.26  | 0.15  | -0.60 | -0.69 |
| 1stn_E_117_F | 0.80  | -0.59 | -0.13 | -1.02 | -2.27 | -2.57 |
| 1stn_E_117_G | 2.20  | 2.24  | 1.37  | 1.52  | 3.51  | 3.79  |
| 1stn_E_124_A | 2.40  | -1.09 | -0.54 | -0.66 | -0.35 | -0.53 |
| 1stn_E_124_G | 3.80  | 2.54  | 2.15  | 2.12  | 3.15  | 4.00  |
| 1stn_E_130_A | 0.70  | 0.78  | 0.00  | -0.19 | -2.60 | -1.60 |
| 1stn_E_130_F | 1.20  | -1.49 | -0.57 | -0.75 | -2.49 | -1.71 |
| 1stn_E_130_G | 1.70  | 2.05  | 1.51  | 1.38  | -0.07 | -0.07 |
| 1stn_E_38_A  | -0.30 | 0.18  | -0.19 | -0.31 | -2.63 | -2.57 |
| 1stn_E_38_D  | -0.20 | 1.24  | 0.69  | 1.81  | 0.46  | 0.97  |
| 1stn_E_38_G  | -0.50 | 1.05  | 0.50  | 1.10  | -2.76 | -2.44 |
| 1stn_E_47_A  | 0.10  | 2.37  | 1.39  | 1.71  | 2.48  | 3.21  |
| 1stn_E_47_G  | 0.40  | 3.26  | 2.60  | 3.06  | 1.16  | 1.02  |
| 1stn_E_52_A  | 0.20  | -0.33 | -0.77 | -1.01 | -2.15 | -1.50 |
| 1stn_E_52_F  | 0.80  | -1.66 | -0.89 | -1.61 | -2.52 | -2.00 |
| 1stn_E_52_G  | 1.60  | 1.54  | 0.85  | 0.81  | 1.12  | 2.09  |
| 1stn_E_5_A   | 1.30  | 0.44  | 0.95  | 0.68  | 0.16  | -0.18 |
| 1stn_E_5_G   | 1.80  | 2.74  | 1.58  | 2.01  | 2.15  | 1.52  |
| 1stn_E_62_A  | 1.00  | -0.92 | 0.29  | 0.73  | -0.75 | -0.23 |
| 1stn_E_62_F  | 1.40  | -0.59 | 0.22  | -0.79 | 1.08  | -1.29 |
| 1stn_E_62_G  | 0.90  | 1.96  | 0.39  | 1.64  | 0.36  | 0.96  |
| 1stn_E_68_A  | 1.20  | -1.33 | -0.52 | 0.00  | -1.50 | -2.04 |
| 1stn_E_68_F  | 1.10  | -5.35 | -4.91 | -4.97 | -6.31 | -7.46 |
| 1stn_E_68_G  | 2.70  | 3.16  | 2.04  | 1.93  | 0.15  | 2.37  |
| 1stn_E_70_A  | 2.20  | 1.42  | 1.78  | 1.58  | -0.22 | 0.03  |
| 1stn_E_70_G  | 3.50  | 4.90  | 4.04  | 4.15  | 2.23  | 2.26  |
| 1stn_E_70_V  | 2.31  | -0.22 | 0.61  | -0.23 | -1.87 | -1.63 |
| 1stn_E_96_A  | 1.90  | -1.25 | -1.23 | -0.41 | -2.84 | -2.34 |
| 1stn_E_96_G  | 3.10  | 1.21  | 0.64  | 1.62  | 0.38  | 1.68  |
| 1stn_F_29_A  | 3.70  | 8.46  | 7.91  | 7.71  | 9.01  | 9.33  |
| 1stn_F_29_G  | 6.20  | 11.65 | 10.99 | 10.36 | 11.35 | 12.63 |
| 1stn_F_56_A  | 2.30  | 4.36  | 3.59  | 4.29  | 4.40  | 4.07  |
| 1stn_F_56_G  | 4.80  | 6.28  | 5.49  | 6.05  | 6.20  | 6.65  |
| 1stn_F_71_A  | 4.00  | 5.14  | 4.55  | 5.30  | 5.02  | 4.94  |
| 1stn_F_71_G  | 4.70  | 6.33  | 6.11  | 6.09  | 6.88  | 6.13  |
| 1stn_G_15_A  | 0.30  | -1.17 | -1.61 | -1.75 | -1.69 | -0.93 |
| 1stn_G_24_A  | 1.25  | 2.00  | 2.56  | 2.21  | 5.88  | 5.87  |
| 1stn_G_24_F  | 1.25  | 0.83  | 2.12  | 2.35  | 2.99  | 3.33  |
| 1stn_G_45_A  | -0.25 | 1.95  | 2.63  | 2.99  | 1.83  | 2.31  |
| 1stn_G_45_F  | 0.60  | 1.01  | 1.10  | 1.20  | 1.44  | 2.28  |
| 1stn_G_45_V  | 1.10  | 6.64  | 6.22  | 5.86  | 4.88  | 5.01  |
| 1stn_G_81_A  | 0.55  | 2.17  | 4.30  | 2.98  | 4.82  | 5.95  |
| 1stn_G_83_A  | 0.10  | -1.01 | -1.39 | -1.28 | -2.35 | -1.84 |
| 1stn_G_91_A  | 1.75  | 1.92  | 2.98  | 3.02  | 5.72  | 4.48  |
| 1stn_H_116_A | 3.10  | 4.24  | 3.22  | 3.33  | 2.50  | 1.81  |
| 1stn_H_116_G | 4.20  | 5.27  | 4.76  | 4.39  | 3.45  | 3.36  |
| 1stn_H_119_A | -0.40 | 1.10  | 0.32  | 0.30  | -0.50 | -0.21 |
| 1stn_H_119_F | -0.30 | 0.71  | 0.68  | 0.92  | 0.39  | -0.17 |
| 1stn_H_119_G | 0.50  | 2.46  | 1.98  | 1.04  | 1.96  | 1.69  |
| 1stn_H_3_A   | 0.40  | 0.38  | 0.00  | 0.93  | -0.47 | -0.41 |
| 1stn_H_3_G   | 0.80  | 1.90  | 1.26  | 0.42  | 1.29  | 0.41  |
| 1stn_H_41_A  | 0.50  | 4.75  | 4.57  | 4.77  | 4.34  | 4.93  |
| 1stn_H_41_G  | 0.40  | 6.64  | 6.06  | 6.16  | 6.27  | 6.56  |

|              |       |       |       |       |       |       |
|--------------|-------|-------|-------|-------|-------|-------|
| 1stn_I_10_A  | 2.65  | 3.85  | 3.25  | 3.42  | 4.54  | 4.86  |
| 1stn_I_10_G  | 3.30  | 5.48  | 5.11  | 4.60  | 5.29  | 4.15  |
| 1stn_I_10_V  | 0.80  | 1.30  | 0.99  | 1.15  | 1.37  | 1.79  |
| 1stn_I_134_A | 3.50  | 2.59  | 2.53  | 2.14  | 1.27  | 0.16  |
| 1stn_I_134_G | 4.40  | 4.41  | 3.35  | 3.41  | 3.67  | 3.85  |
| 1stn_I_134_V | 1.50  | 1.81  | 0.73  | 1.26  | 1.48  | 1.95  |
| 1stn_I_13_A  | 2.50  | 2.54  | 2.27  | 2.80  | 2.39  | 1.66  |
| 1stn_I_13_G  | 2.50  | 4.21  | 4.43  | 5.11  | 4.76  | 3.73  |
| 1stn_I_13_M  | 0.60  | 0.96  | 1.52  | 1.68  | 1.07  | 0.93  |
| 1stn_I_13_V  | 1.10  | 1.07  | 1.79  | 0.73  | 1.12  | 0.93  |
| 1stn_I_67_A  | 5.10  | 4.79  | 4.53  | 4.35  | 5.01  | 4.86  |
| 1stn_I_67_G  | 6.50  | 7.77  | 5.86  | 7.51  | 7.73  | 7.04  |
| 1stn_I_67_V  | 1.80  | 0.88  | 1.70  | 0.55  | 0.38  | 1.57  |
| 1stn_I_87_A  | 4.00  | 4.55  | 4.21  | 3.84  | 5.36  | 5.38  |
| 1stn_I_87_G  | 6.60  | 6.95  | 7.13  | 6.42  | 7.85  | 9.33  |
| 1stn_I_87_V  | 0.50  | 1.16  | 1.31  | 1.07  | 0.27  | 1.61  |
| 1stn_K_105_A | 1.30  | 1.88  | 0.63  | 1.00  | 1.56  | 0.54  |
| 1stn_K_105_G | 2.70  | 1.93  | 0.83  | 2.08  | 1.20  | 0.95  |
| 1stn_K_111_A | -0.70 | -0.49 | -0.92 | -0.85 | -0.86 | -0.54 |
| 1stn_K_111_F | 0.10  | -0.39 | 0.55  | 0.50  | 1.36  | 0.55  |
| 1stn_K_111_G | -1.00 | 0.73  | 0.04  | 0.73  | 0.08  | -0.15 |
| 1stn_K_11_A  | 0.20  | 0.20  | 0.17  | 0.29  | -0.61 | -0.84 |
| 1stn_K_11_F  | 0.50  | -0.68 | -1.72 | -0.95 | -0.12 | 0.28  |
| 1stn_K_11_G  | 0.70  | 1.21  | 0.55  | 0.96  | -1.15 | -0.66 |
| 1stn_K_122_A | -0.20 | 0.74  | -0.89 | 0.47  | -1.09 | 0.42  |
| 1stn_K_122_F | 0.30  | -0.30 | -0.44 | -0.71 | -0.72 | -0.28 |
| 1stn_K_122_G | 0.70  | 2.18  | 1.61  | 2.39  | 1.41  | 1.01  |
| 1stn_K_128_A | 1.40  | -1.01 | -0.78 | -0.98 | -1.39 | -1.63 |
| 1stn_K_128_F | 1.40  | -0.30 | -0.76 | -0.08 | -0.75 | -0.35 |
| 1stn_K_128_G | 3.30  | 0.85  | 1.30  | 0.86  | -0.28 | 0.47  |
| 1stn_K_129_A | -0.10 | -0.21 | -0.37 | -0.50 | -1.62 | -0.44 |
| 1stn_K_129_F | 0.40  | -0.86 | -0.95 | -0.06 | 0.42  | -1.77 |
| 1stn_K_129_G | 0.70  | 1.71  | 0.86  | 1.38  | 0.57  | 0.58  |
| 1stn_K_131_A | 0.80  | 0.90  | 0.74  | 0.46  | 1.62  | 0.73  |
| 1stn_K_131_F | 1.20  | -1.02 | -0.71 | -1.11 | 0.84  | -0.49 |
| 1stn_K_131_G | 0.05  | 0.36  | 0.03  | -0.96 | -2.91 | -2.53 |
| 1stn_K_19_A  | 0.20  | 1.37  | 1.23  | 0.27  | 0.67  | 0.99  |
| 1stn_K_19_G  | 1.20  | 4.18  | 4.18  | 3.98  | 4.51  | 3.44  |
| 1stn_K_1_A   | -0.30 | 0.54  | -0.29 | -0.12 | 0.22  | 0.47  |
| 1stn_K_1_G   | -0.30 | 0.26  | -0.46 | -0.53 | -0.09 | 0.23  |
| 1stn_K_23_A  | 0.70  | 0.24  | 0.80  | 0.35  | 0.73  | 0.12  |
| 1stn_K_23_F  | 0.90  | -0.22 | 0.02  | -0.06 | 0.28  | 1.55  |
| 1stn_K_23_G  | 0.70  | 0.07  | -0.04 | -0.29 | -2.15 | -1.44 |
| 1stn_K_40_A  | -0.30 | -0.48 | -0.55 | -0.52 | 0.38  | -0.85 |
| 1stn_K_40_G  | -0.20 | 0.38  | 0.42  | 0.48  | -0.80 | 0.69  |
| 1stn_K_43_A  | -0.10 | 1.51  | 1.50  | 0.69  | 0.66  | 1.92  |
| 1stn_K_43_F  | 0.50  | -0.44 | -0.15 | -0.37 | -0.93 | -1.42 |
| 1stn_K_43_G  | -0.20 | 2.40  | 1.64  | 2.31  | 0.63  | 0.58  |
| 1stn_K_44_A  | 0.30  | 1.51  | 0.32  | 0.10  | 0.28  | 0.03  |
| 1stn_K_44_F  | 0.00  | 0.29  | 0.99  | 0.20  | -0.06 | -0.70 |
| 1stn_K_44_G  | 0.20  | 2.48  | 2.22  | 2.68  | 1.87  | 1.65  |
| 1stn_K_48_A  | 0.20  | 1.37  | 1.39  | 0.48  | -0.56 | -0.19 |
| 1stn_K_48_G  | 0.30  | 1.94  | 1.14  | 0.79  | 1.04  | 0.22  |
| 1stn_K_4_A   | 1.40  | 1.08  | 0.80  | 0.19  | -0.67 | 0.36  |
| 1stn_K_4_G   | 1.90  | 2.31  | 2.08  | 1.91  | 0.74  | 1.57  |
| 1stn_K_58_A  | 0.50  | 1.17  | 0.06  | 1.18  | 0.68  | 0.88  |



|              |       |       |       |       |       |       |
|--------------|-------|-------|-------|-------|-------|-------|
| 1stn_K_58_F  | 2.00  | -0.29 | 0.08  | -0.97 | 1.06  | 1.09  |
| 1stn_K_58_G  | 1.50  | 3.69  | 2.50  | 2.24  | 2.30  | 1.29  |
| 1stn_K_59_A  | -0.10 | -0.21 | 0.57  | -0.42 | -0.16 | -0.70 |
| 1stn_K_59_F  | 0.30  | -1.16 | -0.27 | -0.26 | 0.68  | -0.47 |
| 1stn_K_59_G  | 0.40  | 1.75  | 0.92  | 0.75  | 0.91  | 1.77  |
| 1stn_K_65_A  | 0.10  | 0.84  | 0.59  | -0.21 | -0.13 | 1.14  |
| 1stn_K_65_F  | 0.10  | 0.47  | 1.29  | -0.11 | 1.47  | -0.64 |
| 1stn_K_65_G  | 0.50  | 0.73  | 0.68  | 0.43  | -0.96 | -1.31 |
| 1stn_K_65_W  | 0.50  | 1.25  | 0.96  | 1.39  | 1.86  | 0.57  |
| 1stn_K_66_A  | 0.40  | 0.38  | 0.61  | 0.63  | 0.06  | 0.66  |
| 1stn_K_66_F  | 0.00  | -1.02 | -0.79 | -0.27 | -0.70 | -0.75 |
| 1stn_K_66_G  | 1.10  | 2.46  | 2.02  | 2.29  | 1.15  | 1.48  |
| 1stn_K_73_A  | 0.60  | 0.35  | -0.74 | 0.31  | -0.66 | 0.07  |
| 1stn_K_73_F  | -0.10 | -1.70 | -1.28 | -1.94 | -1.35 | -1.11 |
| 1stn_K_73_G  | 1.10  | 1.63  | 0.12  | 0.45  | 0.19  | -0.10 |
| 1stn_K_79_A  | -0.20 | 0.01  | 0.34  | 0.21  | 0.61  | 0.91  |
| 1stn_K_79_F  | 0.90  | 0.88  | 1.10  | 0.67  | 1.85  | 1.19  |
| 1stn_K_79_G  | 0.30  | 0.51  | 0.24  | 0.33  | 0.28  | 0.07  |
| 1stn_K_92_A  | 0.10  | 0.74  | 0.33  | 0.35  | 0.46  | 0.92  |
| 1stn_K_92_F  | 0.70  | -0.56 | -0.58 | -0.84 | -1.24 | -0.62 |
| 1stn_K_92_G  | 1.70  | 2.18  | 1.93  | 1.81  | 1.98  | 3.31  |
| 1stn_L_103_A | 5.80  | 4.72  | 4.26  | 4.62  | 3.40  | 5.03  |
| 1stn_L_103_G | 7.20  | 6.57  | 5.76  | 6.05  | 5.80  | 6.86  |
| 1stn_L_120_A | 4.90  | 4.52  | 3.68  | 3.54  | 3.82  | 3.95  |
| 1stn_L_120_G | 7.00  | 7.30  | 5.84  | 5.99  | 5.47  | 7.73  |
| 1stn_L_132_A | 2.30  | 2.59  | 1.75  | 2.66  | 2.24  | 2.71  |
| 1stn_L_132_G | 4.60  | 3.67  | 3.94  | 3.48  | 3.90  | 3.44  |
| 1stn_L_20_A  | 2.70  | 5.12  | 4.30  | 5.00  | 4.25  | 4.72  |
| 1stn_L_20_G  | 4.50  | 8.27  | 8.06  | 8.19  | 8.64  | 8.89  |
| 1stn_L_2_A   | 1.60  | 2.14  | 1.84  | 1.92  | 1.31  | 1.85  |
| 1stn_L_2_G   | 1.50  | 2.96  | 1.83  | 1.89  | 0.28  | 1.59  |
| 1stn_L_31_A  | 3.50  | 3.31  | 2.35  | 3.00  | 3.13  | 0.09  |
| 1stn_L_31_G  | 5.30  | 3.86  | 3.97  | 3.89  | 11.31 | 13.12 |
| 1stn_L_32_A  | 1.70  | 2.09  | 2.22  | 1.29  | 1.34  | 1.14  |
| 1stn_L_32_G  | 3.80  | 4.85  | 4.73  | 4.81  | 3.48  | 5.51  |
| 1stn_L_33_A  | 1.65  | 3.31  | 3.47  | 3.08  | 3.35  | 3.94  |
| 1stn_L_33_G  | 0.55  | 2.06  | 1.82  | 1.65  | -0.94 | 2.36  |
| 1stn_L_84_A  | 2.60  | 3.35  | 3.13  | 2.87  | 2.18  | 3.60  |
| 1stn_L_84_G  | 3.20  | 5.42  | 5.26  | 4.83  | 5.58  | 7.11  |
| 1stn_L_98_A  | 4.60  | 2.68  | 2.50  | 2.26  | -1.67 | -1.67 |
| 1stn_L_98_G  | 6.60  | 5.18  | 4.90  | 5.62  | 1.72  | 2.01  |
| 1stn_L_9_A   | 2.30  | 4.13  | 3.44  | 3.31  | 2.68  | 3.51  |
| 1stn_L_9_G   | 3.70  | 4.12  | 5.03  | 5.10  | 4.55  | 6.32  |
| 1stn_M_21_A  | 1.50  | 1.72  | 1.42  | 1.41  | 1.90  | 1.59  |
| 1stn_M_21_G  | 2.20  | 3.26  | 3.86  | 2.77  | 3.82  | 4.98  |
| 1stn_M_21_I  | 0.90  | 0.17  | -0.01 | -0.17 | 0.66  | 0.53  |
| 1stn_M_21_L  | 0.50  | -0.63 | -0.54 | 0.24  | 0.68  | -1.13 |
| 1stn_M_27_A  | 1.70  | 2.26  | 1.83  | 1.54  | 1.82  | 0.76  |
| 1stn_M_27_G  | 2.40  | 4.29  | 4.22  | 4.65  | 2.88  | 3.21  |
| 1stn_M_27_I  | 0.60  | -0.63 | -0.86 | -0.67 | -0.23 | -1.35 |
| 1stn_M_27_L  | 0.80  | 0.22  | 0.25  | 0.27  | 0.30  | 1.55  |
| 1stn_M_60_A  | 2.00  | 2.15  | 1.94  | 1.72  | 0.72  | 0.99  |
| 1stn_M_60_G  | 4.60  | 4.23  | 2.63  | 3.81  | 3.75  | 3.10  |
| 1stn_M_60_L  | 0.80  | -1.00 | -0.06 | -0.63 | 0.18  | -0.78 |
| 1stn_M_93_A  | 4.60  | 2.10  | 1.11  | 1.71  | 0.67  | 0.97  |
| 1stn_M_93_G  | 4.50  | 4.86  | 4.27  | 4.65  | 3.03  | 2.44  |

|              |       |       |       |       |       |       |
|--------------|-------|-------|-------|-------|-------|-------|
| 1stn_M_93_I  | 4.40  | 2.88  | 2.83  | 3.14  | 0.70  | 0.32  |
| 1stn_N_113_A | 2.05  | 0.47  | -0.25 | -0.37 | 2.02  | 3.43  |
| 1stn_N_113_D | 2.40  | 1.01  | 1.42  | 2.46  | 3.46  | 3.80  |
| 1stn_N_113_G | 1.85  | 1.76  | 2.67  | 1.83  | 3.83  | 4.46  |
| 1stn_N_114_A | 1.25  | 0.42  | 0.78  | 1.37  | 0.47  | -0.15 |
| 1stn_N_114_G | 1.25  | 2.19  | 2.49  | 1.90  | -2.45 | -1.80 |
| 1stn_N_133_A | 1.05  | -0.05 | 0.88  | 0.91  | 2.21  | 2.15  |
| 1stn_N_133_G | -0.15 | -0.83 | -1.88 | -2.20 | 2.75  | 2.68  |
| 1stn_N_63_A  | 0.50  | 0.56  | 0.12  | 0.96  | 0.35  | -0.15 |
| 1stn_N_63_G  | 0.50  | 1.14  | 0.44  | 0.96  | 0.58  | 1.78  |
| 1stn_N_95_A  | 5.20  | -2.51 | -3.25 | -2.63 | 0.06  | 0.91  |
| 1stn_N_95_G  | 5.10  | 1.24  | -0.06 | -0.50 | 3.64  | 5.25  |
| 1stn_P_112_A | -0.80 | 1.09  | 1.57  | 1.90  | 0.38  | 1.89  |
| 1stn_P_112_F | -0.30 | -0.35 | 0.56  | 1.31  | 0.58  | 0.19  |
| 1stn_P_112_G | -1.25 | 2.01  | 1.65  | 2.13  | 1.02  | 0.27  |
| 1stn_P_112_L | -0.20 | -0.56 | 1.82  | 0.62  | 1.04  | 1.10  |
| 1stn_P_112_T | -1.10 | 1.61  | 1.24  | 1.70  | 1.81  | 0.25  |
| 1stn_P_26_A  | 0.55  | -0.18 | 0.41  | 0.60  | 2.87  | 2.06  |
| 1stn_P_26_G  | 1.60  | 1.00  | 1.14  | 2.85  | 3.67  | 4.50  |
| 1stn_P_37_A  | -0.10 | 1.19  | 1.40  | 1.81  | -1.63 | -1.83 |
| 1stn_P_37_G  | 0.40  | 3.59  | 4.28  | 3.96  | -0.37 | 0.62  |
| 1stn_P_42_A  | 0.60  | 0.33  | 1.26  | 0.82  | 2.47  | 1.66  |
| 1stn_P_42_F  | 0.30  | 1.01  | 2.45  | 1.63  | 2.61  | 2.96  |
| 1stn_P_42_G  | 0.10  | 1.13  | 1.97  | 1.99  | 2.54  | 1.63  |
| 1stn_P_51_A  | 0.00  | 1.42  | 1.52  | 2.03  | 2.75  | 2.88  |
| 1stn_P_51_G  | 1.00  | 3.20  | 3.10  | 3.49  | 3.24  | 3.15  |
| 1stn_P_6_A   | 0.40  | -0.02 | 1.48  | 0.21  | 1.76  | 2.36  |
| 1stn_P_6_F   | 0.60  | -1.76 | -1.22 | -0.91 | 0.86  | 0.35  |
| 1stn_P_6_G   | 1.00  | 0.85  | 2.44  | 1.13  | 2.39  | 2.79  |
| 1stn_Q_101_A | -0.10 | 1.42  | 1.37  | 0.80  | 0.63  | 1.54  |
| 1stn_Q_101_G | 1.50  | 3.07  | 2.59  | 2.75  | 2.41  | 2.87  |
| 1stn_Q_118_A | 0.40  | 0.15  | -0.08 | 0.25  | 1.41  | 0.25  |
| 1stn_Q_118_F | 0.70  | 0.46  | 0.54  | -0.89 | 0.52  | -1.08 |
| 1stn_Q_118_G | 0.60  | 1.49  | 1.69  | 1.69  | 2.13  | 1.19  |
| 1stn_Q_126_A | 0.20  | 1.25  | 0.38  | 0.94  | -0.49 | -1.64 |
| 1stn_Q_126_F | 0.70  | -1.59 | -1.29 | -0.45 | -2.65 | -3.30 |
| 1stn_Q_126_G | 2.40  | 2.04  | 0.70  | 1.90  | 1.30  | 0.30  |
| 1stn_Q_25_A  | 0.30  | -0.33 | -0.24 | -0.55 | 0.13  | -0.87 |
| 1stn_Q_25_G  | 0.90  | 2.57  | 1.02  | 0.58  | 0.95  | 0.83  |
| 1stn_Q_75_A  | 0.10  | 0.27  | -0.68 | -0.73 | 0.52  | -0.15 |
| 1stn_Q_75_F  | 0.70  | 0.55  | 0.94  | -0.31 | 0.50  | 0.10  |
| 1stn_Q_75_G  | 1.40  | 0.53  | 0.38  | 0.68  | 1.15  | 1.13  |
| 1stn_R_100_A | 1.40  | -0.46 | 0.79  | -0.37 | -2.32 | -2.48 |
| 1stn_R_100_F | 3.10  | -0.30 | -0.22 | 0.31  | -2.06 | -2.19 |
| 1stn_R_100_G | 2.40  | 1.55  | 2.15  | 0.96  | -1.11 | -0.62 |
| 1stn_R_121_A | 1.70  | 0.47  | 0.66  | 1.30  | -0.88 | -1.31 |
| 1stn_R_121_G | 2.90  | 1.16  | 1.47  | 1.53  | 1.28  | 2.18  |
| 1stn_R_30_A  | 1.40  | -0.54 | -0.74 | -2.04 | -0.82 | -0.28 |
| 1stn_R_30_G  | 2.20  | 1.11  | 0.63  | 0.81  | 0.08  | 1.51  |
| 1stn_R_76_A  | 1.10  | 0.16  | 0.45  | -0.72 | -0.39 | -1.07 |
| 1stn_R_76_G  | 2.20  | 1.08  | 0.69  | 0.98  | 1.81  | 1.46  |
| 1stn_R_82_A  | 0.90  | 1.21  | 1.52  | 0.55  | 0.50  | 2.37  |
| 1stn_R_82_G  | 2.60  | 3.71  | 3.09  | 2.92  | 2.90  | 3.96  |
| 1stn_S_123_A | -0.70 | -1.28 | -0.65 | -0.78 | -1.64 | -2.07 |
| 1stn_S_123_F | 1.00  | -2.79 | -2.66 | -2.50 | -3.07 | -3.72 |
| 1stn_S_123_G | 1.60  | 1.67  | 2.03  | 1.16  | -0.93 | -0.58 |

|              |       |       |       |       |       |       |
|--------------|-------|-------|-------|-------|-------|-------|
| 1stn_S_136_A | 0.40  | -0.02 | 0.32  | -0.41 | -0.96 | -0.16 |
| 1stn_S_136_G | 0.90  | 0.19  | 0.06  | 0.71  | 0.09  | -0.55 |
| 1stn_S_54_A  | -0.40 | -1.15 | -1.08 | -0.02 | -3.31 | -3.27 |
| 1stn_S_54_F  | 0.00  | -3.62 | -3.21 | -3.53 | -2.40 | -3.03 |
| 1stn_S_54_G  | 1.10  | 0.95  | 1.33  | 0.79  | -0.16 | -0.50 |
| 1stn_T_115_A | 1.20  | -0.45 | 0.39  | -0.59 | -1.44 | -3.03 |
| 1stn_T_115_G | 2.10  | 1.87  | 1.09  | 1.43  | -0.04 | -0.38 |
| 1stn_T_115_S | 0.60  | -0.04 | 0.96  | 0.32  | -1.97 | -0.19 |
| 1stn_T_115_V | 1.80  | 1.22  | 0.72  | 0.99  | 1.78  | 0.77  |
| 1stn_T_17_A  | 1.60  | 2.20  | 1.17  | 1.46  | -0.05 | 0.62  |
| 1stn_T_17_G  | 2.40  | 4.44  | 3.63  | 3.77  | 2.41  | 2.52  |
| 1stn_T_17_S  | 0.60  | 1.06  | 1.96  | 1.15  | 0.39  | 0.59  |
| 1stn_T_17_V  | 0.90  | -0.82 | -0.54 | -0.30 | 0.00  | -2.13 |
| 1stn_T_28_A  | 1.40  | 0.45  | 0.11  | 0.84  | 0.00  | -0.52 |
| 1stn_T_28_G  | 2.50  | 2.09  | 2.34  | 2.34  | 2.70  | 3.57  |
| 1stn_T_28_S  | 1.15  | 0.60  | 1.55  | 1.25  | 0.57  | 1.45  |
| 1stn_T_28_V  | -0.40 | -0.42 | -1.35 | -1.20 | -1.01 | -0.23 |
| 1stn_T_36_A  | 0.00  | 0.52  | -0.33 | -0.37 | -0.22 | -0.25 |
| 1stn_T_36_G  | 2.00  | 1.84  | 2.23  | 2.32  | -0.66 | 0.51  |
| 1stn_T_36_S  | 1.10  | -0.35 | -0.31 | 0.50  | -2.94 | -3.32 |
| 1stn_T_36_V  | -0.80 | 0.54  | 0.74  | -0.47 | 1.18  | 1.43  |
| 1stn_T_39_A  | 0.40  | 2.53  | 2.33  | 1.79  | 1.95  | 0.01  |
| 1stn_T_39_G  | 0.60  | 2.86  | 2.52  | 3.12  | 3.80  | 2.16  |
| 1stn_T_39_S  | 0.00  | 0.79  | 1.23  | 0.46  | 1.33  | 0.00  |
| 1stn_T_39_V  | -0.10 | 1.91  | 2.27  | 2.29  | 3.18  | 1.33  |
| 1stn_T_57_A  | 2.40  | 1.73  | 1.57  | 1.52  | 3.69  | 2.96  |
| 1stn_T_57_G  | 3.50  | 4.51  | 3.84  | 4.26  | 7.52  | 7.00  |
| 1stn_T_57_S  | 2.10  | 1.09  | 1.09  | 0.71  | 0.36  | 2.23  |
| 1stn_T_57_V  | 0.20  | 1.76  | 1.01  | 1.81  | 3.93  | 3.65  |
| 1stn_T_77_A  | 0.90  | 0.69  | 0.58  | 1.36  | -0.88 | -0.08 |
| 1stn_T_77_G  | 2.00  | 2.43  | 2.39  | 2.44  | 2.76  | 2.22  |
| 1stn_T_77_S  | 0.70  | 0.88  | 0.82  | 0.86  | 0.91  | 0.66  |
| 1stn_T_77_V  | -0.20 | -0.88 | -0.16 | 0.27  | -0.33 | 0.37  |
| 1stn_T_8_A   | 0.70  | 0.59  | -0.37 | 1.27  | -0.09 | 0.74  |
| 1stn_T_8_G   | 1.10  | 1.92  | 1.72  | 1.31  | 2.18  | 1.24  |
| 1stn_T_8_S   | 0.30  | 0.31  | 1.25  | 0.25  | 0.64  | 1.26  |
| 1stn_T_8_V   | 0.40  | -0.46 | -0.59 | -0.53 | -2.18 | -0.77 |
| 1stn_V_106_A | 4.45  | 2.67  | 2.21  | 2.68  | 3.87  | 4.24  |
| 1stn_V_106_G | 4.90  | 4.81  | 4.70  | 5.20  | 6.71  | 6.19  |
| 1stn_V_106_S | 4.80  | 4.08  | 3.67  | 3.90  | 4.05  | 5.26  |
| 1stn_V_106_T | 2.30  | 3.44  | 2.49  | 3.07  | 3.85  | 3.08  |
| 1stn_V_109_A | 0.00  | 0.94  | 0.36  | 0.05  | -0.83 | 0.28  |
| 1stn_V_109_G | 0.20  | 2.36  | 2.23  | 2.07  | 2.24  | 2.42  |
| 1stn_V_109_S | 0.00  | 0.48  | 1.11  | 1.19  | 2.96  | 1.32  |
| 1stn_V_109_T | 0.30  | 1.60  | 1.56  | 1.08  | 1.66  | 1.04  |
| 1stn_V_18_A  | 2.90  | 2.72  | 1.68  | 2.21  | 3.76  | 3.02  |
| 1stn_V_18_G  | 5.60  | 5.85  | 5.76  | 5.88  | 6.31  | 7.62  |
| 1stn_V_18_S  | 4.70  | 3.20  | 3.77  | 3.80  | 4.76  | 5.04  |
| 1stn_V_18_T  | 3.20  | 1.85  | 1.67  | 1.97  | 2.73  | 3.16  |
| 1stn_V_34_A  | 2.20  | 3.55  | 3.27  | 3.30  | 3.59  | 3.16  |
| 1stn_V_34_G  | 4.70  | 5.58  | 5.37  | 5.86  | 6.07  | 6.57  |
| 1stn_V_34_S  | 2.40  | 3.56  | 4.77  | 3.85  | 4.79  | 4.44  |
| 1stn_V_34_T  | 1.30  | 1.69  | 1.91  | 2.39  | 2.46  | 3.41  |
| 1stn_V_46_A  | 0.25  | 1.57  | 2.21  | 1.75  | 2.97  | 2.17  |
| 1stn_V_46_G  | 0.35  | 3.31  | 2.97  | 3.45  | 4.53  | 4.68  |
| 1stn_V_46_S  | 0.10  | 2.56  | 2.53  | 2.31  | 2.78  | 4.18  |

|              |       |       |       |       |       |       |
|--------------|-------|-------|-------|-------|-------|-------|
| 1stn_V_46_T  | -0.20 | 0.27  | 0.82  | 0.74  | -1.53 | -2.37 |
| 1stn_V_61_A  | 2.20  | 1.03  | 2.01  | 2.09  | 2.92  | 1.37  |
| 1stn_V_61_G  | 4.40  | 4.04  | 4.01  | 4.34  | 4.75  | 5.33  |
| 1stn_V_61_L  | 0.03  | -2.68 | -2.42 | -2.20 | -2.50 | -2.72 |
| 1stn_V_61_M  | 0.20  | -0.16 | 0.28  | -0.63 | 0.75  | 1.54  |
| 1stn_V_61_S  | 3.10  | 2.48  | 3.71  | 2.66  | 3.49  | 3.99  |
| 1stn_V_61_T  | 1.30  | 1.46  | 1.21  | 0.70  | 1.93  | 1.44  |
| 1stn_V_69_A  | 3.10  | 2.31  | 3.17  | 2.97  | 3.39  | 3.99  |
| 1stn_V_69_G  | 6.60  | 5.67  | 6.50  | 6.33  | 6.18  | 6.40  |
| 1stn_V_69_S  | 5.40  | 3.41  | 4.25  | 3.72  | 4.95  | 5.72  |
| 1stn_V_69_T  | 3.80  | 1.86  | 2.72  | 2.82  | 3.33  | 3.82  |
| 1stn_V_94_A  | 3.20  | 2.83  | 3.56  | 3.46  | 3.71  | 4.39  |
| 1stn_V_94_G  | 5.00  | 5.79  | 4.80  | 4.95  | 6.51  | 5.59  |
| 1stn_V_94_S  | 5.10  | 3.69  | 4.59  | 3.73  | 4.45  | 5.27  |
| 1stn_V_94_T  | 3.30  | 2.34  | 3.15  | 2.24  | 3.97  | 4.32  |
| 1stn_V_99_A  | 2.90  | 2.38  | 3.18  | 2.04  | 2.06  | 3.12  |
| 1stn_V_99_G  | 6.50  | 5.20  | 5.10  | 6.13  | 4.91  | 5.54  |
| 1stn_V_99_S  | 4.90  | 4.30  | 4.63  | 3.78  | 5.32  | 5.60  |
| 1stn_V_99_T  | 2.50  | 2.88  | 2.28  | 2.81  | 4.36  | 3.74  |
| 1stn_Y_108_A | -0.05 | 1.12  | 1.17  | 0.07  | 1.63  | 1.35  |
| 1stn_Y_108_F | 0.00  | -0.21 | 0.15  | -0.11 | 0.80  | 0.91  |
| 1stn_Y_108_G | 0.25  | 3.08  | 1.97  | 2.31  | 3.98  | 4.20  |
| 1stn_Y_108_L | -0.20 | 0.88  | 1.64  | 0.42  | 0.83  | 0.78  |
| 1stn_Y_110_A | 0.30  | 2.40  | 2.60  | 2.87  | 2.16  | 2.77  |
| 1stn_Y_110_F | 0.10  | 0.03  | 1.06  | 0.52  | 0.01  | 0.14  |
| 1stn_Y_110_G | 0.70  | 5.47  | 4.97  | 4.80  | 5.27  | 5.60  |
| 1stn_Y_110_L | 0.30  | 1.45  | 1.22  | 1.59  | 0.73  | 0.69  |
| 1stn_Y_22_A  | 3.50  | 5.00  | 4.90  | 4.77  | 3.25  | 5.12  |
| 1stn_Y_22_D  | 5.40  | 6.57  | 6.74  | 6.46  | 6.34  | 8.00  |
| 1stn_Y_22_E  | 5.00  | 6.18  | 6.82  | 6.07  | 7.83  | 7.29  |
| 1stn_Y_22_F  | 0.30  | -0.78 | 0.09  | -0.36 | -0.83 | 0.55  |
| 1stn_Y_22_G  | 5.45  | 9.81  | 8.67  | 8.61  | 6.78  | 9.04  |
| 1stn_Y_22_H  | 1.60  | 2.16  | 1.32  | 1.84  | 2.03  | 1.02  |
| 1stn_Y_22_I  | 2.50  | 1.99  | 1.93  | 2.69  | 0.15  | 0.99  |
| 1stn_Y_22_K  | 3.90  | 3.82  | 4.31  | 4.10  | 4.87  | 6.07  |
| 1stn_Y_22_L  | 1.50  | 1.66  | 2.10  | 2.35  | 2.13  | 1.94  |
| 1stn_Y_22_M  | 2.00  | 2.94  | 3.31  | 4.19  | 1.06  | 2.96  |
| 1stn_Y_22_N  | 4.00  | 6.15  | 5.82  | 5.75  | 5.65  | 5.58  |
| 1stn_Y_22_Q  | 3.20  | 4.30  | 4.35  | 4.75  | 5.67  | 7.01  |
| 1stn_Y_22_R  | 2.90  | 5.49  | 4.89  | 5.02  | 7.26  | 6.07  |
| 1stn_Y_22_S  | 3.00  | 5.25  | 5.70  | 5.23  | 4.99  | 6.27  |
| 1stn_Y_22_T  | 3.30  | 5.15  | 4.02  | 4.44  | 4.70  | 4.77  |
| 1stn_Y_22_V  | 3.00  | 3.15  | 2.16  | 2.47  | 1.67  | 2.14  |
| 1stn_Y_22_W  | 0.60  | 0.19  | 0.49  | 0.60  | 0.86  | 1.44  |
| 1stn_Y_80_A  | 0.40  | 0.65  | 0.00  | -0.10 | 0.85  | 3.66  |
| 1stn_Y_80_F  | 0.10  | 1.05  | 0.88  | 0.76  | 0.77  | 1.26  |
| 1stn_Y_80_G  | 1.00  | 2.49  | 1.31  | 0.61  | 1.76  | 1.85  |
| 1stn_Y_80_L  | 0.10  | 1.94  | 1.85  | 2.13  | 4.10  | 4.67  |
| 1stn_Y_86_A  | 5.30  | 8.51  | 8.31  | 8.55  | 9.27  | 11.67 |
| 1stn_Y_86_F  | 2.40  | 1.06  | 1.34  | 2.11  | 3.20  | 4.84  |
| 1stn_Y_86_G  | 6.70  | 11.53 | 11.11 | 11.58 | 12.33 | 12.95 |
| 1stn_Y_86_L  | 3.90  | 7.90  | 7.97  | 7.47  | 9.21  | 9.51  |
| 1stn_Y_88_A  | 6.50  | 7.42  | 7.15  | 7.13  | 5.68  | 7.52  |
| 1stn_Y_88_F  | 2.00  | -0.75 | 0.69  | 0.61  | 0.86  | 0.27  |
| 1stn_Y_88_G  | 7.50  | 10.42 | 9.38  | 9.23  | 7.98  | 8.24  |
| 1stn_Y_88_L  | 4.50  | 6.79  | 5.80  | 5.01  | 4.64  | 4.08  |

|              |       |       |       |       |       |       |
|--------------|-------|-------|-------|-------|-------|-------|
| lsup_N_76_D  | -0.45 | 0.67  | 0.86  | 0.96  | 1.51  | 0.40  |
| lten_A_17_G  | 2.80  | 3.27  | 3.05  | 3.04  | 3.05  | 2.88  |
| lten_A_83_G  | 1.09  | 2.23  | 2.03  | 2.06  | 1.84  | 1.93  |
| lten_E_85_A  | -1.61 | -0.84 | -1.15 | -1.07 | -2.50 | -2.49 |
| lten_E_85_G  | 0.34  | 0.72  | 0.27  | 0.34  | -0.71 | -0.65 |
| lten_F_87_A  | 5.43  | 8.71  | 8.23  | 8.54  | 8.14  | 8.68  |
| lten_I_19_A  | 3.67  | 5.11  | 4.96  | 5.08  | 6.33  | 6.70  |
| lten_I_19_V  | 0.23  | 0.74  | 0.62  | 0.69  | 0.92  | 1.33  |
| lten_I_28_A  | 1.38  | 4.02  | 3.93  | 4.00  | 3.79  | 3.90  |
| lten_I_28_V  | 0.32  | 1.21  | 0.85  | 0.99  | 0.65  | 0.83  |
| lten_I_31_A  | 3.28  | 4.20  | 4.01  | 4.14  | 5.38  | 5.75  |
| lten_I_31_V  | 0.50  | -0.10 | -0.30 | -0.24 | -0.14 | 0.30  |
| lten_I_47_A  | 2.19  | 1.14  | 0.92  | 0.94  | 1.40  | 2.01  |
| lten_I_58_A  | 2.06  | 4.26  | 4.14  | 4.19  | 4.22  | 4.52  |
| lten_I_58_V  | 0.83  | 2.64  | 2.42  | 2.47  | 2.10  | 2.38  |
| lten_I_7_A   | 2.86  | 5.15  | 5.03  | 5.13  | 6.12  | 6.17  |
| lten_I_7_V   | 0.18  | 1.75  | 1.46  | 1.59  | 1.74  | 1.77  |
| lten_L_1_A   | 2.11  | 4.86  | 4.54  | 4.67  | 3.76  | 4.15  |
| lten_L_33_A  | 4.29  | 4.93  | 4.61  | 4.75  | 6.13  | 6.93  |
| lten_L_49_A  | 2.99  | 3.07  | 2.73  | 2.93  | 2.93  | 3.36  |
| lten_L_61_A  | 4.22  | 4.47  | 4.17  | 4.45  | 3.64  | 4.05  |
| lten_L_71_A  | 3.06  | 4.28  | 3.93  | 4.20  | 4.74  | 5.41  |
| lten_P_24_A  | 1.73  | 3.23  | 4.04  | 4.20  | 4.83  | 4.60  |
| lten_P_41_A  | 0.46  | 0.44  | 1.22  | 1.38  | 1.15  | 0.79  |
| lten_P_4_A   | 2.74  | 2.86  | 3.63  | 3.79  | 4.41  | 3.99  |
| lten_P_63_A  | 0.93  | 1.74  | 2.53  | 2.72  | 3.27  | 3.03  |
| lten_P_82_A  | 0.11  | 0.79  | 1.56  | 1.70  | 2.03  | 1.67  |
| lten_S_73_A  | -0.04 | -0.87 | -1.09 | -0.97 | 0.10  | 0.62  |
| lten_S_80_A  | 2.82  | 1.63  | 1.63  | 1.60  | 5.65  | 6.00  |
| lten_T_65_A  | 1.96  | 1.12  | 1.00  | 1.15  | 1.75  | 2.34  |
| lten_T_65_S  | 1.22  | 1.47  | 1.52  | 1.59  | 1.40  | 1.81  |
| lten_T_89_A  | 3.43  | 1.76  | 1.69  | 1.78  | 4.41  | 5.19  |
| lten_T_89_S  | 1.92  | 2.98  | 3.08  | 2.93  | 6.72  | 7.23  |
| lten_V_69_A  | 2.81  | 3.05  | 3.08  | 3.10  | 4.27  | 4.63  |
| lten_V_9_A   | 1.36  | 3.52  | 3.57  | 3.64  | 5.29  | 5.63  |
| lten_Y_35_A  | 4.22  | 6.25  | 5.81  | 5.93  | 4.98  | 5.44  |
| lten_Y_35_F  | 0.44  | -0.20 | -0.05 | -0.15 | -0.48 | -0.31 |
| lten_Y_56_A  | 1.38  | 5.63  | 5.28  | 5.27  | 4.77  | 5.27  |
| lten_Y_56_G  | 4.14  | 8.92  | 8.19  | 8.39  | 8.03  | 8.70  |
| lten_Y_67_F  | 3.13  | 0.13  | 0.16  | -0.05 | 1.51  | 1.65  |
| lu5p_A_155_G | 1.10  | 1.18  | 1.39  | 0.70  | 1.32  | 1.49  |
| lu5p_A_159_G | 1.10  | 0.74  | 0.95  | 0.97  | 0.93  | 1.92  |
| lu5p_A_190_G | 1.10  | 1.50  | 1.28  | 1.07  | 1.47  | 1.30  |
| lu5p_A_203_G | 2.60  | 2.55  | 2.04  | 2.38  | 2.54  | 3.08  |
| lu5p_A_205_G | 1.80  | 1.48  | 1.16  | 1.65  | 1.79  | 1.92  |
| lu5p_D_118_A | 0.20  | -0.60 | -0.62 | -1.13 | -1.84 | -2.14 |
| lu5p_D_118_G | 1.20  | 0.65  | 0.36  | 0.41  | -0.95 | -0.70 |
| lu5p_D_169_A | 0.10  | -0.68 | -0.34 | -0.52 | -1.20 | -1.85 |
| lu5p_D_169_G | 1.30  | 0.48  | 0.33  | 0.35  | -0.16 | 0.23  |
| lu5p_D_194_A | -0.70 | -1.11 | -1.02 | -1.11 | -1.95 | -1.72 |
| lu5p_D_194_G | 0.30  | 0.43  | -0.01 | 0.35  | -0.50 | -0.02 |
| lu5p_E_126_A | -0.10 | 0.02  | -0.47 | -0.12 | -0.48 | -0.91 |
| lu5p_E_126_G | 1.10  | 1.74  | 1.17  | 1.21  | 1.58  | 1.22  |
| lu5p_F_113_A | 3.70  | 7.20  | 5.77  | 6.42  | 6.21  | 6.05  |
| lu5p_F_113_L | 1.30  | 5.24  | 5.28  | 5.36  | 4.63  | 5.19  |
| lu5p_F_192_A | 2.80  | 7.46  | 7.35  | 7.59  | 6.94  | 7.35  |

|              |       |       |       |       |       |       |
|--------------|-------|-------|-------|-------|-------|-------|
| 1u5p_F_192_L | -0.50 | 3.70  | 4.02  | 3.58  | 3.85  | 3.83  |
| 1u5p_H_111_A | -0.50 | 3.44  | 2.94  | 3.12  | -0.11 | 0.57  |
| 1u5p_H_111_G | 0.50  | 5.29  | 4.93  | 5.42  | 3.31  | 4.30  |
| 1u5p_H_150_A | 1.40  | 2.41  | 1.52  | 1.56  | -0.52 | 0.63  |
| 1u5p_H_160_A | 2.30  | 2.30  | 1.55  | 1.47  | 1.15  | 1.97  |
| 1u5p_I_124_A | 3.60  | 4.73  | 4.72  | 4.58  | 3.98  | 3.94  |
| 1u5p_I_124_V | 1.60  | 2.25  | 2.15  | 2.59  | 2.15  | 2.56  |
| 1u5p_I_164_A | 2.80  | 1.16  | 1.32  | 2.01  | 2.09  | 2.30  |
| 1u5p_I_164_V | 0.60  | 0.03  | -0.27 | 0.04  | 0.50  | 0.32  |
| 1u5p_I_185_A | 2.00  | 2.36  | 2.17  | 2.56  | 2.76  | 3.73  |
| 1u5p_I_185_V | 0.60  | 2.33  | 1.76  | 2.19  | 2.71  | 3.06  |
| 1u5p_K_127_A | 0.00  | 2.25  | 1.65  | 1.70  | -0.32 | 0.85  |
| 1u5p_K_148_A | -0.40 | -0.08 | 0.09  | -0.48 | -0.67 | -0.18 |
| 1u5p_K_148_G | 0.50  | 0.98  | 1.20  | 0.84  | 1.39  | 1.26  |
| 1u5p_K_173_A | 0.10  | 0.15  | -0.22 | -0.23 | -1.08 | -0.54 |
| 1u5p_K_173_G | 1.40  | 1.55  | 1.23  | 1.23  | 0.80  | 1.56  |
| 1u5p_K_197_A | 0.40  | 0.17  | 0.30  | 0.19  | -1.07 | -0.01 |
| 1u5p_K_197_G | 1.30  | 1.64  | 1.14  | 1.26  | 1.24  | 1.71  |
| 1u5p_L_146_A | 0.20  | 1.83  | 1.52  | 1.69  | 0.69  | 0.84  |
| 1u5p_L_153_A | 2.80  | 3.02  | 2.19  | 2.59  | 2.70  | 2.34  |
| 1u5p_L_157_A | 3.80  | 2.78  | 2.57  | 2.39  | 2.97  | 3.54  |
| 1u5p_L_174_A | 2.40  | 2.87  | 2.90  | 3.10  | 3.49  | 3.56  |
| 1u5p_L_189_A | 2.80  | 3.60  | 3.40  | 3.74  | 3.18  | 3.94  |
| 1u5p_L_199_A | 3.80  | 4.06  | 3.25  | 3.69  | 3.79  | 3.81  |
| 1u5p_L_210_A | 1.40  | 4.84  | 4.81  | 5.25  | 4.28  | 4.72  |
| 1u5p_M_117_A | 2.20  | 2.64  | 2.66  | 2.74  | 1.75  | 2.37  |
| 1u5p_N_145_A | -0.20 | -0.18 | -0.16 | -0.49 | -0.60 | -0.67 |
| 1u5p_N_145_G | 0.40  | 1.10  | 1.20  | 1.15  | 0.23  | 0.57  |
| 1u5p_P_162_A | -0.40 | 0.43  | 1.56  | 1.80  | 1.43  | 1.68  |
| 1u5p_Q_165_A | 0.70  | 0.42  | 0.49  | 0.15  | -0.06 | 0.03  |
| 1u5p_Q_165_G | 1.80  | 2.18  | 1.83  | 1.64  | 1.65  | 1.98  |
| 1u5p_Q_187_A | 0.00  | 0.55  | 0.65  | 0.45  | 0.49  | 0.20  |
| 1u5p_Q_187_G | 1.30  | 1.94  | 1.65  | 1.60  | 1.10  | 1.54  |
| 1u5p_Q_201_A | -0.40 | 0.64  | 0.19  | 0.07  | 0.22  | 0.07  |
| 1u5p_Q_201_G | 0.70  | 1.89  | 1.76  | 1.34  | 1.68  | 2.09  |
| 1u5p_R_115_A | 0.30  | -0.69 | -0.92 | -1.59 | -2.07 | -2.39 |
| 1u5p_R_115_G | 1.90  | 0.38  | 0.12  | -0.03 | -1.31 | -0.49 |
| 1u5p_R_152_A | -0.30 | 0.10  | -0.63 | -0.87 | -1.11 | -0.71 |
| 1u5p_R_152_G | 0.60  | 0.53  | 0.01  | 0.04  | 0.00  | 0.85  |
| 1u5p_R_206_A | 0.00  | 0.43  | -0.01 | 0.04  | -2.21 | -1.11 |
| 1u5p_T_141_A | -0.30 | 0.08  | 0.01  | -0.21 | -0.92 | -0.92 |
| 1u5p_T_141_G | 0.10  | -0.03 | -0.52 | 0.44  | -1.06 | -0.12 |
| 1u5p_V_131_A | 0.20  | 0.75  | 0.81  | 0.97  | 1.22  | 1.92  |
| 1u5p_V_143_A | 0.40  | -0.62 | -0.35 | -0.16 | -0.45 | -0.03 |
| 1u5p_V_167_A | 2.30  | 2.18  | 2.07  | 2.09  | 2.18  | 2.09  |
| 1u5p_W_196_F | 2.10  | 2.71  | 2.89  | 2.56  | 2.49  | 3.79  |
| lycc_K_78_A  | 0.45  | 0.17  | -0.12 | -0.10 | 0.53  | -0.25 |
| lycc_K_78_G  | 0.74  | 1.26  | 0.79  | 0.85  | 1.57  | 1.42  |
| lycc_L_90_A  | 2.80  | 4.13  | 3.72  | 3.92  | 7.05  | 6.97  |
| lycc_N_57_A  | -2.97 | -0.86 | -0.88 | -0.87 | -3.20 | -3.38 |
| 200l_A_121_L | -2.30 | 1.98  | 2.23  | 1.44  | 1.97  | -0.53 |
| 227l_A_104_F | -3.10 | -4.07 | -3.44 | -3.93 | -4.25 | -2.68 |
| 235l_A_111_V | -1.30 | -0.52 | -1.03 | -1.08 | -0.20 | -0.33 |
| 236l_A_87_V  | -1.70 | -1.45 | -1.25 | -2.19 | -3.98 | -2.66 |
| 237l_A_149_V | -3.20 | -2.31 | -1.96 | -2.54 | -1.28 | -3.06 |
| 238l_A_103_V | -2.20 | -1.24 | -1.74 | -2.36 | -0.52 | -1.10 |

|              |       |       |       |       |       |       |
|--------------|-------|-------|-------|-------|-------|-------|
| 239I_A_17_I  | -2.70 | -4.45 | -4.40 | -4.54 | -5.25 | -5.62 |
| 240I_A_27_I  | -3.10 | -2.91 | -2.83 | -3.03 | 0.72  | -3.41 |
| 241I_A_29_I  | -2.60 | 3.16  | 1.26  | 2.30  | 6.40  | -0.98 |
| 242I_A_50_I  | -2.00 | 0.03  | 0.07  | -0.77 | -0.65 | -0.29 |
| 243I_A_58_I  | -3.20 | -4.29 | -3.97 | -4.20 | -4.78 | -6.03 |
| 244I_A_100_I | -3.40 | -2.32 | -2.06 | -2.20 | -6.00 | 0.04  |
| 246I_A_67_F  | -1.90 | -1.18 | -1.05 | -0.93 | 6.31  | 8.12  |
| 247I_A_84_L  | -3.90 | -3.68 | -3.15 | -3.66 | -2.71 | 0.09  |
| 253I_A_20_D  | -0.30 | -1.85 | -0.67 | -0.75 | -1.73 | -1.58 |
| 2bqa_I_106_V | 0.98  | 2.39  | 2.05  | 3.15  | 2.22  | 2.26  |
| 2chf_A_100_G | 1.00  | 2.10  | 1.95  | 1.97  | 3.23  | 2.11  |
| 2chf_A_102_G | 1.70  | 2.54  | 2.43  | 2.56  | 1.72  | 2.36  |
| 2chf_A_112_G | 1.30  | 1.69  | 1.53  | 1.78  | 1.68  | 1.75  |
| 2chf_A_113_G | 0.80  | 1.00  | 0.66  | 0.77  | 0.90  | 0.97  |
| 2chf_A_35_G  | 3.10  | 3.05  | 2.80  | 2.72  | 2.41  | 2.96  |
| 2chf_A_41_G  | 2.30  | 3.29  | 2.92  | 3.32  | 3.23  | 3.72  |
| 2chf_A_73_G  | 0.30  | 0.94  | 0.92  | 0.88  | 1.17  | 1.18  |
| 2chf_A_96_G  | 1.40  | 1.64  | 1.54  | 1.77  | 2.24  | 2.14  |
| 2chf_A_97_G  | 1.30  | 2.02  | 1.91  | 2.10  | 2.16  | 2.67  |
| 2chf_A_98_G  | 0.50  | 1.75  | 1.13  | 1.27  | 1.74  | 2.02  |
| 2chf_D_11_A  | -2.50 | -1.66 | -1.84 | -1.67 | -3.75 | -2.12 |
| 2chf_D_12_A  | -2.70 | -1.33 | -1.39 | -1.43 | -3.11 | -2.40 |
| 2chf_D_37_A  | 1.90  | 1.38  | 1.19  | 0.95  | 2.50  | 3.66  |
| 2chf_D_37_G  | 1.00  | 1.79  | 1.67  | 1.73  | 1.27  | 1.99  |
| 2chf_D_56_A  | -3.40 | -1.00 | -1.36 | -0.95 | -1.86 | -1.84 |
| 2chf_D_63_A  | 1.00  | 0.19  | -0.15 | 0.09  | 1.16  | 1.62  |
| 2chf_F_13_A  | -0.80 | 0.38  | -0.18 | 0.14  | 0.19  | 0.57  |
| 2chf_I_122_V | 0.80  | 2.09  | 1.93  | 1.95  | 2.20  | 2.27  |
| 2chf_I_54_V  | 1.50  | 2.49  | 1.98  | 2.09  | 1.87  | 2.29  |
| 2chf_I_71_V  | 1.50  | 1.56  | 1.36  | 1.45  | 1.31  | 1.53  |
| 2chf_N_22_G  | 0.00  | 1.41  | 0.90  | 1.06  | 0.04  | -0.53 |
| 2chf_P_60_G  | 0.60  | 1.94  | 2.31  | 2.49  | 2.69  | 3.51  |
| 2chf_T_111_A | 1.50  | 1.44  | 1.42  | 1.59  | 2.85  | 1.80  |
| 2chf_T_111_G | 1.00  | 0.99  | 0.81  | 1.04  | 0.27  | 0.57  |
| 2chf_V_107_T | 1.00  | 1.00  | 1.17  | 1.44  | 1.82  | 1.72  |
| 2chf_V_10_T  | 3.20  | 2.47  | 2.66  | 2.54  | 3.66  | 3.59  |
| 2chf_V_20_T  | 0.20  | 2.23  | 2.39  | 2.20  | 2.91  | 2.82  |
| 2chf_V_32_T  | 1.50  | 3.74  | 4.03  | 3.93  | 6.74  | 6.75  |
| 2chf_V_39_T  | 0.80  | -0.71 | -0.34 | -0.32 | -1.44 | -1.34 |
| 2chf_V_82_T  | 3.50  | 2.81  | 2.82  | 2.80  | 3.01  | 2.46  |
| 2chf_V_9_T   | 4.00  | 4.28  | 4.28  | 4.06  | 6.48  | 5.88  |
| 2ci2_A_17_G  | 1.41  | 1.77  | 1.71  | 1.78  | 1.76  | 2.51  |
| 2ci2_A_59_G  | 1.88  | 0.62  | 0.74  | 0.59  | 1.36  | 1.39  |
| 2ci2_D_24_A  | 1.05  | 0.23  | 0.16  | 0.28  | -1.16 | -1.13 |
| 2ci2_D_46_A  | 1.02  | 0.08  | -0.39 | -0.12 | -0.67 | -0.96 |
| 2ci2_D_53_A  | 3.14  | 1.59  | 1.34  | 1.48  | 2.96  | 3.29  |
| 2ci2_D_56_N  | 0.00  | -2.06 | -2.35 | -1.47 | -2.18 | -2.16 |
| 2ci2_E_15_D  | 0.77  | 0.50  | -0.25 | 0.49  | 0.45  | 0.33  |
| 2ci2_E_15_N  | 0.28  | -0.21 | -0.41 | -0.26 | 0.20  | 0.24  |
| 2ci2_E_15_Q  | 0.40  | -0.51 | -0.14 | -0.45 | -0.60 | -0.41 |
| 2ci2_E_16_D  | -0.36 | 0.72  | 0.83  | 0.75  | 1.98  | 2.59  |
| 2ci2_E_16_N  | 0.08  | 0.11  | 0.32  | 0.02  | 1.62  | 2.13  |
| 2ci2_E_16_Q  | 0.68  | -0.51 | -0.51 | -0.69 | 0.91  | 1.27  |
| 2ci2_E_27_A  | 0.11  | 0.93  | 0.65  | 0.52  | -1.72 | -1.95 |
| 2ci2_E_42_A  | 1.09  | 0.47  | 0.43  | 0.30  | -0.42 | -0.57 |
| 2ci2_E_8_A   | 1.03  | 0.03  | -0.93 | -0.18 | -1.84 | -1.32 |

|             |       |       |       |       |       |       |
|-------------|-------|-------|-------|-------|-------|-------|
| 2ci2_E_8_Q  | 0.57  | -0.35 | -0.69 | -0.34 | -2.41 | -1.58 |
| 2ci2_F_51_A | 3.21  | 5.76  | 4.96  | 5.52  | 3.25  | 2.48  |
| 2ci2_F_51_L | 1.92  | 1.58  | 1.27  | 1.65  | 0.52  | 0.78  |
| 2ci2_F_51_V | 1.41  | 4.68  | 4.20  | 4.14  | 2.89  | 1.78  |
| 2ci2_I_21_L | 1.96  | 1.59  | 2.09  | 1.93  | 1.79  | 0.15  |
| 2ci2_I_21_V | 1.02  | 1.51  | 1.38  | 1.63  | 2.02  | 2.00  |
| 2ci2_I_30_A | 3.40  | 5.31  | 4.73  | 5.39  | 6.38  | 6.36  |
| 2ci2_I_30_V | 0.75  | 1.87  | 1.74  | 1.83  | 2.39  | 2.29  |
| 2ci2_I_31_A | 2.12  | 3.76  | 3.55  | 3.81  | 3.69  | 2.94  |
| 2ci2_I_31_G | 3.52  | 5.12  | 4.51  | 4.56  | 4.64  | 4.24  |
| 2ci2_I_31_V | -0.08 | 1.59  | 1.12  | 1.28  | 0.25  | 0.36  |
| 2ci2_I_38_A | 1.28  | 0.22  | 0.06  | 0.35  | 1.16  | 1.20  |
| 2ci2_I_58_A | 4.09  | 3.46  | 3.03  | 3.40  | 3.81  | 4.07  |
| 2ci2_I_58_V | 0.08  | 0.44  | 0.40  | 0.42  | 0.12  | 0.37  |
| 2ci2_K_12_A | 1.20  | 0.77  | 0.84  | 0.77  | 1.15  | 0.76  |
| 2ci2_K_18_A | 1.13  | 0.32  | 0.31  | 0.12  | 0.15  | 0.23  |
| 2ci2_K_18_G | 2.01  | 2.66  | 1.76  | 1.71  | 2.09  | 2.49  |
| 2ci2_K_19_A | 0.99  | 0.42  | 0.32  | 0.30  | -0.09 | -0.19 |
| 2ci2_K_19_G | 1.58  | 1.06  | 1.17  | 1.57  | 1.60  | 1.49  |
| 2ci2_K_25_A | 0.61  | 2.25  | 1.71  | 1.88  | -0.62 | -0.61 |
| 2ci2_K_25_G | 3.49  | 5.21  | 4.76  | 5.10  | 1.34  | 1.28  |
| 2ci2_K_3_A  | 1.04  | 1.86  | 0.62  | 1.26  | -2.05 | -1.77 |
| 2ci2_K_3_M  | 0.73  | 0.76  | 0.35  | 0.10  | -1.95 | -2.60 |
| 2ci2_K_54_N | 1.21  | -0.23 | -0.47 | -0.21 | -0.11 | 0.08  |
| 2ci2_L_22_A | 1.21  | 2.40  | 2.32  | 2.16  | 2.12  | 2.74  |
| 2ci2_L_22_G | 2.09  | 3.51  | 3.25  | 3.38  | 4.08  | 4.77  |
| 2ci2_L_33_A | 1.74  | 2.74  | 2.30  | 2.17  | 2.52  | 2.89  |
| 2ci2_L_33_I | 1.01  | 0.49  | 0.42  | 0.32  | 0.45  | 0.50  |
| 2ci2_L_33_V | 1.02  | 1.24  | 0.60  | 1.28  | 0.80  | 0.93  |
| 2ci2_L_50_A | 3.56  | 4.78  | 3.83  | 4.77  | 5.47  | 5.93  |
| 2ci2_L_9_A  | 1.91  | 4.67  | 4.47  | 4.61  | 4.67  | 5.18  |
| 2ci2_N_57_A | 1.22  | 0.20  | 0.05  | 0.11  | -0.86 | -0.91 |
| 2ci2_N_57_D | 1.51  | 1.06  | 0.88  | 1.16  | 1.81  | 1.87  |
| 2ci2_P_26_A | -0.36 | 1.26  | 2.17  | 2.11  | 1.73  | 1.87  |
| 2ci2_P_34_A | 0.58  | 0.15  | 1.26  | 1.55  | 2.04  | 1.80  |
| 2ci2_P_62_A | 3.50  | 1.78  | 2.88  | 2.80  | 3.27  | 3.17  |
| 2ci2_P_7_A  | -3.40 | 1.08  | 1.84  | 2.46  | 1.74  | 1.96  |
| 2ci2_Q_23_A | 0.54  | -0.43 | -0.20 | -0.53 | -0.51 | -0.66 |
| 2ci2_Q_23_G | 0.92  | 0.64  | 0.65  | 0.14  | 0.90  | 0.59  |
| 2ci2_R_44_A | 1.02  | 0.64  | 0.81  | 0.71  | 0.23  | 0.65  |
| 2ci2_R_49_A | 1.31  | -1.01 | -1.10 | -1.14 | -3.07 | -2.61 |
| 2ci2_S_13_A | 1.02  | -0.08 | -0.31 | -0.49 | 0.69  | 1.09  |
| 2ci2_S_13_G | 0.06  | 0.63  | 0.50  | 0.52  | 0.13  | 0.68  |
| 2ci2_T_37_A | 1.42  | -1.08 | -1.13 | -0.57 | -0.82 | -1.15 |
| 2ci2_T_37_S | 0.98  | -0.01 | -0.31 | -0.21 | 0.75  | 0.52  |
| 2ci2_T_37_V | 1.57  | -0.97 | -1.08 | -1.16 | -2.08 | -1.87 |
| 2ci2_T_40_A | 0.68  | 0.53  | 0.21  | 0.49  | 0.09  | 0.25  |
| 2ci2_T_40_D | 0.04  | 0.88  | 1.95  | 1.96  | 1.58  | 0.99  |
| 2ci2_T_4_A  | 0.85  | 1.34  | 0.77  | 1.22  | 1.79  | 1.37  |
| 2ci2_T_4_G  | 1.16  | 2.43  | 1.82  | 1.87  | 3.19  | 2.09  |
| 2ci2_T_4_V  | 0.32  | 0.30  | -0.19 | -0.09 | 0.31  | -0.03 |
| 2ci2_V_20_A | 0.03  | 1.47  | 1.34  | 1.39  | 1.86  | 1.37  |
| 2ci2_V_35_A | 0.64  | -0.20 | -0.36 | -0.30 | -0.13 | 0.15  |
| 2ci2_V_35_G | 2.43  | 1.56  | 1.45  | 1.43  | 1.96  | 1.88  |
| 2ci2_V_35_T | 1.03  | -0.01 | -0.05 | 0.25  | 0.91  | 1.12  |
| 2ci2_V_39_A | 0.67  | 1.10  | 0.90  | 1.12  | 2.12  | 1.74  |



|              |       |       |       |       |       |       |
|--------------|-------|-------|-------|-------|-------|-------|
| 2ci2_V_48_A  | 4.97  | 4.81  | 5.13  | 4.97  | 5.44  | 6.01  |
| 2ci2_V_52_A  | 1.13  | 2.49  | 2.49  | 2.50  | 2.25  | 2.64  |
| 2ci2_V_61_A  | 1.51  | 1.67  | 1.61  | 1.76  | 1.38  | 1.47  |
| 2ci2_V_61_G  | 3.24  | 3.64  | 3.45  | 3.59  | 3.89  | 3.75  |
| 2ci2_V_61_T  | 0.38  | 1.29  | 1.41  | 1.52  | 1.35  | 1.18  |
| 2ci2_V_64_A  | 1.45  | 2.80  | 2.62  | 2.52  | 2.36  | 1.92  |
| 2ci2_V_64_G  | 3.50  | 4.88  | 4.58  | 4.51  | 4.67  | 4.26  |
| 2ci2_V_64_T  | 1.15  | 2.54  | 2.86  | 2.37  | 3.21  | 3.51  |
| 2lzm_D_20_A  | 0.30  | -1.50 | -1.38 | -1.72 | -1.10 | -2.00 |
| 2lzm_D_47_A  | 0.95  | -0.47 | 0.20  | -0.78 | -1.61 | -1.01 |
| 2lzm_D_92_N  | 1.40  | 0.39  | -0.38 | 0.20  | 0.93  | 1.95  |
| 2lzm_E_11_A  | -1.10 | 0.75  | -0.07 | 0.82  | -1.63 | -1.69 |
| 2lzm_E_128_A | 0.16  | 0.47  | 0.02  | 0.31  | 0.22  | -0.24 |
| 2lzm_E_45_A  | -0.01 | -0.90 | 0.07  | -0.62 | -2.72 | -1.47 |
| 2lzm_F_104_A | 3.10  | 5.55  | 5.53  | 4.41  | 4.53  | 5.17  |
| 2lzm_F_153_A | 3.80  | 6.17  | 6.89  | 6.45  | 5.74  | 6.83  |
| 2lzm_F_153_L | -0.30 | 2.28  | 2.30  | 2.09  | 1.58  | 0.52  |
| 2lzm_F_67_A  | 1.90  | 4.15  | 3.83  | 4.09  | 5.73  | 6.48  |
| 2lzm_I_100_A | 3.40  | 4.08  | 4.17  | 3.46  | 4.93  | 3.51  |
| 2lzm_I_17_A  | 2.70  | 4.98  | 4.75  | 5.06  | 3.64  | 3.53  |
| 2lzm_I_27_A  | 3.10  | 4.31  | 4.42  | 4.57  | 4.20  | 4.42  |
| 2lzm_I_29_A  | 2.60  | 3.96  | 2.86  | 3.20  | 4.38  | 4.50  |
| 2lzm_I_3_A   | 0.70  | 2.01  | 2.21  | 2.29  | 2.55  | 2.04  |
| 2lzm_I_3_G   | 2.10  | 5.07  | 4.06  | 3.87  | 4.33  | 6.00  |
| 2lzm_I_3_T   | 2.30  | 2.06  | 1.83  | 1.86  | 3.05  | 2.54  |
| 2lzm_I_3_V   | 0.40  | 1.31  | 0.35  | -0.06 | 2.16  | 2.49  |
| 2lzm_I_50_A  | 2.00  | 2.90  | 2.89  | 2.89  | 3.11  | 3.65  |
| 2lzm_I_58_A  | 3.20  | 5.49  | 5.33  | 6.08  | 5.83  | 6.99  |
| 2lzm_I_78_A  | 1.60  | 3.71  | 4.57  | 5.23  | 5.19  | 4.39  |
| 2lzm_K_124_G | 0.10  | -0.37 | -0.15 | 0.28  | -2.39 | -2.67 |
| 2lzm_K_43_A  | 1.03  | 1.59  | 0.83  | 1.02  | 0.09  | 0.08  |
| 2lzm_K_48_A  | 0.56  | 0.96  | -0.47 | 1.03  | 1.02  | -0.89 |
| 2lzm_L_118_A | 3.50  | 3.89  | 3.56  | 4.21  | 4.30  | 4.25  |
| 2lzm_L_121_A | 2.30  | 3.94  | 4.02  | 3.49  | 3.89  | 4.24  |
| 2lzm_L_133_A | 4.30  | 4.22  | 4.25  | 5.01  | 4.47  | 4.25  |
| 2lzm_L_33_A  | 3.60  | 6.17  | 5.98  | 5.89  | 5.97  | 6.20  |
| 2lzm_L_39_A  | 0.90  | 1.22  | 0.72  | 0.95  | 1.34  | 1.24  |
| 2lzm_L_46_A  | 1.86  | 6.41  | 4.60  | 5.16  | 3.52  | 4.21  |
| 2lzm_L_66_A  | 3.90  | 3.51  | 3.28  | 4.08  | 3.01  | 3.64  |
| 2lzm_L_7_A   | 2.60  | 4.86  | 4.89  | 3.59  | 4.54  | 5.03  |
| 2lzm_L_84_A  | 3.90  | 4.44  | 4.60  | 5.64  | 5.57  | 5.77  |
| 2lzm_L_91_A  | 3.10  | 4.04  | 5.16  | 4.52  | 4.83  | 5.31  |
| 2lzm_L_99_A  | 4.50  | 5.32  | 4.44  | 4.66  | 5.58  | 6.44  |
| 2lzm_L_99_G  | 6.30  | 8.10  | 7.58  | 6.18  | 9.21  | 8.84  |
| 2lzm_M_106_A | 2.30  | 4.53  | 3.78  | 4.08  | 2.28  | 2.42  |
| 2lzm_M_120_A | 0.20  | -0.47 | 0.65  | 0.78  | 0.32  | 0.62  |
| 2lzm_M_6_A   | 1.90  | 2.58  | 1.48  | 1.83  | 0.44  | 0.59  |
| 2lzm_N_116_A | -0.17 | -0.34 | -0.33 | -0.14 | 0.33  | -0.78 |
| 2lzm_N_116_D | -0.60 | 0.50  | 0.83  | 0.06  | 1.54  | 1.50  |
| 2lzm_N_144_D | -0.50 | -0.66 | 0.16  | 0.85  | 0.82  | -0.53 |
| 2lzm_N_163_D | 0.21  | 1.10  | 0.26  | 0.59  | 0.78  | 1.35  |
| 2lzm_N_40_A  | -0.32 | -0.42 | 0.13  | 0.28  | -1.41 | -1.76 |
| 2lzm_N_40_D  | -0.44 | -0.32 | -0.37 | -0.18 | -0.03 | 0.32  |
| 2lzm_N_55_G  | 0.60  | 0.40  | -0.50 | -0.87 | -0.10 | -0.17 |
| 2lzm_N_68_A  | 0.05  | -0.02 | -0.43 | -0.52 | -1.64 | -2.35 |
| 2lzm_P_37_A  | 0.00  | -0.62 | -0.10 | 0.70  | 0.06  | -0.54 |

|              |       |       |       |       |       |       |
|--------------|-------|-------|-------|-------|-------|-------|
| 2lzm_P_86_G  | 1.91  | 1.22  | 0.86  | 1.07  | 1.82  | 2.70  |
| 2lzm_Q_105_A | 0.60  | 1.72  | 1.94  | 2.26  | -1.03 | -0.53 |
| 2lzm_Q_105_E | 1.10  | 1.70  | 1.74  | 1.69  | 3.18  | 2.94  |
| 2lzm_Q_105_G | 3.11  | 2.50  | 2.68  | 3.08  | 0.01  | -0.02 |
| 2lzm_Q_122_A | 0.24  | 0.59  | 0.02  | -0.43 | -0.83 | -1.05 |
| 2lzm_Q_123_A | 0.22  | 0.53  | 0.16  | 0.28  | -0.17 | -0.14 |
| 2lzm_Q_123_E | -0.40 | 1.70  | 1.21  | 1.19  | 1.57  | 2.02  |
| 2lzm_R_119_A | 0.18  | -0.56 | -0.58 | -0.02 | -0.39 | -0.93 |
| 2lzm_S_117_A | -1.27 | -0.82 | -0.67 | -1.59 | -2.31 | -1.90 |
| 2lzm_S_44_A  | -0.34 | -0.93 | -0.48 | -0.99 | -1.37 | -1.87 |
| 2lzm_S_44_G  | 0.53  | 0.29  | 0.07  | 0.97  | 0.25  | -0.54 |
| 2lzm_T_115_A | 0.14  | -0.20 | -1.00 | 0.23  | -1.09 | -2.07 |
| 2lzm_T_151_S | -0.39 | -0.82 | -0.86 | 1.42  | 0.27  | -0.10 |
| 2lzm_T_152_S | 2.60  | 1.14  | 1.25  | 1.17  | 2.50  | 1.58  |
| 2lzm_T_157_A | 0.50  | 1.31  | 3.11  | 2.85  | 4.76  | 4.96  |
| 2lzm_T_157_G | 1.10  | 1.06  | 1.61  | 1.38  | 1.80  | -0.06 |
| 2lzm_T_157_S | 0.66  | 0.62  | 1.36  | 1.52  | 0.54  | 1.90  |
| 2lzm_T_157_V | 1.20  | 1.88  | 2.20  | 1.87  | 3.05  | 4.45  |
| 2lzm_T_26_S  | -0.57 | -0.02 | 0.91  | 1.71  | 0.86  | -0.61 |
| 2lzm_T_59_A  | 1.50  | 1.67  | 0.15  | 0.52  | 2.48  | 1.86  |
| 2lzm_T_59_G  | 1.60  | 0.81  | 1.14  | 1.23  | 0.49  | 2.28  |
| 2lzm_T_59_S  | 0.20  | 0.53  | -1.01 | 0.15  | -0.39 | 0.02  |
| 2lzm_T_59_V  | 1.50  | 2.21  | 2.14  | 2.37  | 3.37  | 4.83  |
| 2lzm_V_103_A | 1.91  | 2.33  | 2.81  | 1.62  | 1.93  | 1.58  |
| 2lzm_V_111_A | 1.30  | 2.49  | 2.72  | 2.83  | 1.74  | 2.30  |
| 2lzm_V_131_A | -0.39 | -0.13 | 0.67  | -0.07 | -0.22 | 0.28  |
| 2lzm_V_131_G | 0.68  | 1.30  | 0.65  | 0.68  | -0.19 | 1.66  |
| 2lzm_V_131_T | 0.12  | -0.27 | 0.58  | 0.36  | 1.09  | 0.73  |
| 2lzm_V_149_A | 2.87  | 2.41  | 2.08  | 1.93  | 0.78  | 0.67  |
| 2lzm_V_149_T | 2.80  | 1.45  | 1.51  | 1.21  | 1.31  | 1.13  |
| 2lzm_V_71_A  | 1.50  | 2.88  | 2.40  | 1.61  | 3.28  | 3.81  |
| 2lzm_V_75_T  | 1.30  | 0.86  | 2.12  | 1.67  | 3.09  | 1.99  |
| 2lzm_V_87_A  | 1.70  | 1.63  | 2.54  | 2.70  | 3.87  | 3.17  |
| 2lzm_V_87_T  | 1.60  | 0.76  | 1.13  | 0.44  | 2.53  | 2.56  |
| 2lzm_V_94_A  | 1.80  | 1.33  | 0.89  | 1.87  | 2.23  | 2.19  |
| 2lzm_Y_25_G  | 4.55  | 7.30  | 7.08  | 7.07  | 6.12  | 7.57  |
| 4lyz_D_101_A | -0.76 | -5.16 | -3.17 | -3.35 | -1.81 | -2.64 |
| 4lyz_D_101_G | -0.45 | -0.53 | -1.12 | -1.01 | -1.73 | -1.08 |
| 4lyz_D_101_N | -0.04 | -0.57 | -0.60 | -0.77 | -5.22 | -1.31 |
| 4lyz_I_55_A  | 4.40  | 2.59  | 2.50  | 2.42  | 3.61  | 1.98  |
| 4lyz_I_55_T  | 4.96  | 3.46  | 3.36  | 3.62  | 2.75  | 4.04  |
| 4lyz_I_55_V  | 0.91  | 0.82  | 0.89  | 0.89  | 2.77  | 0.29  |
| 4lyz_S_91_A  | 0.15  | -1.52 | -1.72 | -1.60 | -0.99 | -3.13 |
| 5azu_A_82_G  | 1.67  | 2.31  | 1.84  | 2.27  | 1.67  | 1.69  |
| 5azu_F_110_A | 5.02  | 8.40  | 8.36  | 8.34  | 7.34  | 8.50  |
| 5azu_F_97_A  | 2.63  | 8.35  | 8.14  | 8.12  | 7.92  | 8.10  |
| 5azu_I_20_A  | 1.98  | 5.61  | 5.74  | 5.40  | 6.09  | 5.96  |
| 5azu_I_20_T  | 2.39  | 4.34  | 3.83  | 4.12  | 5.35  | 5.57  |
| 5azu_I_20_V  | 0.38  | 2.45  | 2.03  | 1.70  | 2.05  | 2.06  |
| 5azu_I_7_A   | 3.35  | 4.15  | 4.11  | 4.57  | 2.99  | 3.94  |
| 5azu_I_81_A  | 1.91  | 3.85  | 3.04  | 3.20  | 3.25  | 3.68  |
| 5azu_I_81_T  | 2.51  | 2.87  | 2.58  | 2.93  | 3.01  | 3.36  |
| 5azu_I_81_V  | 0.16  | 0.99  | 0.86  | 1.10  | 0.21  | 0.80  |
| 5azu_L_33_A  | 1.67  | 5.34  | 4.55  | 4.78  | 4.81  | 5.18  |
| 5azu_L_50_A  | 1.79  | 6.33  | 5.49  | 5.91  | 6.31  | 6.72  |
| 5azu_L_50_T  | 2.34  | 7.48  | 6.37  | 6.78  | 7.77  | 8.24  |

|              |       |       |      |       |       |      |
|--------------|-------|-------|------|-------|-------|------|
| 5azu_L_50_V  | 0.36  | 6.99  | 7.09 | 6.78  | 7.08  | 7.20 |
| 5azu_M_121_A | 2.87  | 3.73  | 3.18 | 3.36  | 2.00  | 3.03 |
| 5azu_V_22_A  | 1.67  | 4.54  | 4.68 | 4.87  | 6.17  | 5.85 |
| 5azu_V_31_A  | 1.67  | 4.00  | 4.23 | 4.25  | 5.02  | 5.07 |
| 5azu_V_5_A   | 0.96  | 2.17  | 2.09 | 2.24  | 1.95  | 1.88 |
| 5azu_V_60_G  | 3.11  | 4.01  | 3.93 | 3.82  | 3.45  | 3.45 |
| 5azu_V_95_A  | 0.96  | 3.01  | 2.78 | 3.19  | 2.64  | 2.94 |
| 5azu_W_48_A  | 3.35  | 10.52 | 9.64 | 10.17 | 9.23  | 9.90 |
| 5azu_Y_108_A | 3.59  | 7.85  | 7.40 | 7.39  | 8.00  | 8.51 |
| 8tim_K_192_A | -1.00 | 0.19  | 0.32 | -0.35 | -2.22 | 0.72 |
| 8tim_Q_178_A | -0.10 | 0.61  | 0.32 | 0.40  | 0.08  | 0.89 |

## Command lines used in this work:

### Design runs

```
mini/bin/fixbb.macosgccrelease
-database minirosetta_database
-s 1FKB.pdb
-ex1 -ex2 -extrachi_cutoff 0 -linmem_ig 10
-ignore_unrecognized_res -no_optH false -skip_set_reasonable_fold_tree -no_his_his_pairE
-mute core.io core.scoring core.conformation
[-score:weights ./hpatch_weights.txt]
```

### Weight optimization runs

```
mpirun mini/bin/surface_optE_parallel.linuxgccrelease
-database minirosetta_database
-s nataa_recovery_pdbids.test.list
-optE:optimize_nat_aa true
-optE:fit_reference_energies_to_aa_profile_recovery true
-optE:n_design_cycles 10
-optE:mpi_weight_minimization true
-optE:optimize_starting_free_weights true
[ -optE:rescore:weights weights.txt -optE:rescore:outlog rescore.log ]
[ -optE:rescore:measure_sequence_recovery true ]
-optE:number_of_swarm_particles 75 -optE:number_of_swarm_cycles 30
-optE:repeat_swarm_optimization_until_fitness_improves true
-optE:free free_wts.txt -optE:fixed fixed_wts.txt
-ignore_unrecognized_res -no_optH false -skip_set_reasonable_fold_tree -no_his_his_pairE
-mute core.io core.pack core.scoring core.conformation
-ex1 -ex2 -extrachi_cutoff 0 -linmem_ig 10 -options:user
```

|              |                   |
|--------------|-------------------|
| free.txt     | fixed.txt         |
| fa_rep       | fa_atr 0.8        |
| fa_sol       | omega 0.5         |
| fa_intra_rep | hbond_lr_bb 1.17  |
| pro_close    | hbond_sr_bb 0.585 |
| fa_pair      | dslf_ss_dst 1.0   |
| hbond_bb_sc  | dslf_cs_ang 1.0   |
| hbond_sc     | dslf_ss_dih 1.0   |
| rama         | dslf_ca_dih 1.0   |
| fa_dun       | hpatch 0.3        |
| p_aa_pp      |                   |

### QUILT runs

```
quilt -n 252 -ep 1.4 -R 1FKB.pdb
```

### Sequence recovery runs

```
~/minibin/sequencerecovery.macosgccrelease -database ~/minidb/
-native_pdb_list seqrecovery.list -redesign_pdb_list redesigned.list
-ignore_unrecognized_res -mute core
```

### Scoring runs

```
~/minibin/score.macosgccrelease -database ~/minidb/
-l redesigns.list
-ignore_unrecognized_res -mute core
[-score:weights design_hpatch.wts]
```
